# Supplementary material for: Derivatives of penta-, hexa-, and hepta-coordinated tin with Schiff bases and 1,10-phenanthroline: structure, redox and optoelectronic properties
Source: Royal Society of Chemistry journal article supplement (doi:10.1039/d3nj01993d), 2023-01-01
Supplement: d3nj01993d1.pdf [file d3nj01993d1.pdf]

## Supporting Information

### Derivatives of penta-, hexa-, and hepta-coordinated tin with Schiff bases and 1,10-phenanthroline: structure, redox and optoelectronic properties

Irina V. Krylova,<sup>a</sup> Liliya D. Labutskaya,<sup>a,b</sup> Mariya O. Markova,<sup>a,c</sup> Victoriya A. Balycheva,<sup>a</sup> Pavel G. Shangin,<sup>a</sup> Anna Ya. Akyeva,<sup>a</sup> Victoriya V. Golovina,<sup>a,b</sup> Mikhail E. Minyaev,<sup>a</sup> Andrey V. Lalov,<sup>a</sup> Valery M. Pechennikov,<sup>b</sup> Vasiliy T. Novikov,<sup>c</sup> Mikhail P. Egorov <sup>a</sup> and Mikhail A. Syroeshkin <sup>\*a</sup>

<sup>a.</sup> *N.D. Zelinsky Institute of Organic Chemistry RAS, Moscow 119991, Russia, syroeshkin@ioc.ac.ru*

<sup>b.</sup> *Sechenov First Moscow State Medical University, Moscow 119991, Russia*

<sup>c.</sup> *Dmitry Mendeleev University of Chemical Technology of Russia, Moscow 125047, Russia*

### Contents

|                                                                                                              |     |
|--------------------------------------------------------------------------------------------------------------|-----|
| 1. X-ray crystallographic data and refinement details.....                                                   | S2  |
| 2. Crystal structure of <b>1</b> .....                                                                       | S6  |
| 3. Crystal structure of <b>2</b> .....                                                                       | S10 |
| 4. Crystal structure of <b>3</b> .....                                                                       | S12 |
| 5. Crystal structure of <b>4</b> .....                                                                       | S15 |
| 6. Crystal structure of <b>5</b> .....                                                                       | S18 |
| 7. <sup>1</sup> H, <sup>13</sup> C and <sup>119</sup> Sn NMR Spectra for <b>1-5</b> .....                    | S19 |
| 8. HOMO and LUMO of <b>1-5</b> calculated by the DFT PBE0/def2-TZVPP.....                                    | S27 |
| 9. Cartesian coordinates and total energy values of <b>1-5</b> calculated<br>by the DFT PBE0/def2-TZVPP..... | S30 |

## 1. X-ray crystallographic data and refinement details

X-ray diffraction data for **1** and **2** were collected at 100K on a Bruker Quest D8 diffractometer equipped with a Photon-III area-detector (shutterless  $\varphi$ - and  $\omega$ -scan technique), using graphite-monochromatized Mo  $K_{\alpha}$ -radiation. The intensity data were integrated by the *SAINTE* program<sup>1</sup> and were analytically and then semi-empirically corrected for absorption and decay from equivalent reflections by multi-scan methods with *SADABS*.<sup>2</sup> X-ray diffraction data for **3-5** were collected at 100K on a four-circle Rigaku Synergy S diffractometer equipped with a HyPix6000HE area-detector (kappa geometry, shutterless  $\omega$ -scan technique), using monochromatized Cu  $K_{\alpha}$ -radiation (**3** and **5**) or Mo  $K_{\alpha}$ -radiation (**4**). The intensity data were integrated and then analytically (**3** and **4**) or semi-empirically (**5**) corrected for absorption and decay by the CrysAlisPro program.<sup>3</sup> Structure **4** was treated and refined a regular non-merohedral twin. All structures were solved by direct methods with *SHELXT*<sup>4</sup> and refined by the full-matrix least-squares method on  $F^2$  using *SHELXL-2018*<sup>5</sup> within the *ShelXle*<sup>6</sup> or *Olex2*<sup>7</sup> program suites. All non-hydrogen atoms were refined with individual anisotropic displacement parameters. Locations of amino, hydroxy and water hydrogen atoms were found from the electron density-difference map; these hydrogen atoms were refined with individual isotropic displacement parameters. All other hydrogen atoms were placed in ideal calculated positions (C-H distance = 0.950 Å for aromatic and for  $-\text{CH}=\text{}$ , 0.980 Å for methyl and 0.990 Å for methylene hydrogen atoms) and refined as riding atoms with relative isotropic displacement parameters taken as  $U_{\text{iso}}(\text{H})=1.5U_{\text{eq}}(\text{C})$  for methyl groups and  $U_{\text{iso}}(\text{H})=1.2U_{\text{eq}}(\text{C})$  otherwise. A rotating group model was applied for methyl groups. Disorders were refined in a regular manner by applying similarity constraints on anisotropic displacement parameters on similar atoms and by constraining similar distances. The *SHELXTL* program suite<sup>8</sup> and the *Mercury* program<sup>9</sup> were used for molecular graphics in SI and in the manuscript, correspondingly. Crystal data, data collection and structure refinement details for **1-5** are summarized in Table S1. The structures have been deposited at the Cambridge Crystallographic Data Center with the reference CCDC numbers 2241142-2241146; they also contain the supplementary crystallographic data. These data can be obtained free of charge from the CCDC via <https://www.ccdc.cam.ac.uk/structures/>

## References.

1. Bruker. APEX-III. *Bruker AXS Inc.*, Madison, Wisconsin, USA, 2019.
2. Krause, L.; Herbst-Irmer, R.; Sheldrick, G. M.; Stalke, D. Comparison of silver and molybdenum microfocus X-ray sources for single-crystal structure determination. *J. Appl. Cryst.* 2015, **48**, 3–10. <http://doi.org/10.1107/S1600576714022985>
3. CrysAlisPro. Version 1.171.42. *Rigaku Oxford Diffraction*, 2022.

4. Sheldrick, G. M. SHELXT - Integrated space-group and crystal-structure determination. *Acta Cryst.* 2015, **A71**, 3-8. <http://doi.org/10.1107/S2053273314026370>
5. Sheldrick, G. M. Crystal structure refinement with SHELXL. *Acta Cryst.* 2015, **C71**, 3-8. <http://doi.org/10.1107/S2053229614024218>
6. Hübschle C.B., Sheldrick, G. M., B. Dittrich, 'ShelXle: a Qt graphical interface for SHELXL'. *J.Appl.Cryst.* 2011, **44**, 1281-1284. <http://doi.org/10.1107/S0021889811043202>
7. Dolomanov O.V.; Bourhis L.J.; Gildea R.J.; Howard J.A.K.; Puschmann H. OLEX2: a complete structure solution, refinement and analysis program. *J. Appl. Cryst.* 2009, **42**, 339-341. <http://doi.org/10.1107/S0021889808042726>
8. Sheldrick, G.M. A short history of SHELX. *Acta Cryst., Sect. A* 2008, **A64**, 112-122. <http://dx.doi.org/10.1107/S0108767307043930>
9. Macrae, C. F.; Sovago, I.; Cottrell, S. J.; Galek, P. T. A.; McCabe, P.; Pidcock, E.; Platings, M.; Shields, G. P.; Stevens, J. S.; Towler, M.; Wood, P. A. Mercury 4.0: from visualization to analysis, design and prediction. *J. Appl. Cryst.* 2020, **53**, 226-235. <https://doi.org/10.1107/S1600576719014092>

**Table S1.** Crystal data, data collection and structure refinement details for **1-5**.

| Compound                                           | <b>1</b>                                                               | <b>2</b>                                                         | <b>3</b>                                                          | <b>4</b>                                                         | <b>5</b>                                                         |
|----------------------------------------------------|------------------------------------------------------------------------|------------------------------------------------------------------|-------------------------------------------------------------------|------------------------------------------------------------------|------------------------------------------------------------------|
| Empirical formula                                  | C <sub>12</sub> H <sub>17.58</sub> N <sub>3</sub> O <sub>2.29</sub> Sn | C <sub>25</sub> H <sub>29</sub> N <sub>5</sub> O <sub>3</sub> Sn | C <sub>37</sub> H <sub>37</sub> N <sub>7</sub> O <sub>2</sub> SSn | C <sub>24</sub> H <sub>24</sub> N <sub>2</sub> O <sub>2</sub> Sn | C <sub>23</sub> H <sub>23</sub> N <sub>3</sub> O <sub>2</sub> Sn |
| Formula weight                                     | 359.21                                                                 | 566.22                                                           | 762.48                                                            | 491.14                                                           | 492.13                                                           |
| Temperature, K                                     | 100(2)                                                                 | 100(2)                                                           | 100.0(1)                                                          | 100.0(1)                                                         | 100.0(1)                                                         |
| Wavelength, Å                                      | 0.71073                                                                | 0.71073                                                          | 1.54184                                                           | 0.71073                                                          | 1.54184                                                          |
| Crystal system                                     | Triclinic                                                              | Triclinic                                                        | Triclinic                                                         | Triclinic                                                        | Monoclinic                                                       |
| Space group                                        | P $\bar{1}$                                                            | P $\bar{1}$                                                      | P $\bar{1}$                                                       | P $\bar{1}$                                                      | P2 <sub>1</sub> /n                                               |
| Unit cell dimensions                               |                                                                        |                                                                  |                                                                   |                                                                  |                                                                  |
| a, Å                                               | 10.5118(4)                                                             | 9.5849(2)                                                        | 10.43938(8)                                                       | 10.45872(9)                                                      | 8.9435(3)                                                        |
| b, Å                                               | 11.5157(4)                                                             | 11.1754(2)                                                       | 10.61993(6)                                                       | 10.81132(8)                                                      | 15.3162(6)                                                       |
| c, Å                                               | 13.0702(5)                                                             | 12.8127(3)                                                       | 15.96529(10)                                                      | 18.91626(17)                                                     | 14.8791(6)                                                       |
| $\alpha$ , °                                       | 107.0970(10)                                                           | 106.3980(10)                                                     | 107.1063(5)                                                       | 78.4367(7)                                                       | 90                                                               |
| $\beta$ , °                                        | 110.4520(10)                                                           | 91.3010(10)                                                      | 90.6022(6)                                                        | 76.9185(7)                                                       | 97.794(4)                                                        |
| $\gamma$ , °                                       | 94.1500(10)                                                            | 112.7180(10)                                                     | 91.1542(5)                                                        | 88.6387(6)                                                       | 90                                                               |
| Volume, Å <sup>3</sup>                             | 1389.57(9)                                                             | 1200.93(4)                                                       | 1691.10(2)                                                        | 2040.60(3)                                                       | 2019.32(13)                                                      |
| Z                                                  | 4                                                                      | 2                                                                | 2                                                                 | 4                                                                | 4                                                                |
| Density (calcd), g/cm <sup>3</sup>                 | 1.717                                                                  | 1.566                                                            | 1.497                                                             | 1.599                                                            | 1.619                                                            |
| Absorption coefficient ( $\mu$ ), mm <sup>-1</sup> | 1.840                                                                  | 1.101                                                            | 6.947                                                             | 1.275                                                            | 10.263                                                           |
| F(000)                                             | 715.6                                                                  | 576                                                              | 780                                                               | 992                                                              | 992                                                              |
| Crystal size                                       | 0.33×0.20×0.18                                                         | 0.99×0.30×0.16                                                   | 0.67×0.27×0.18                                                    | 0.35×0.25×0.12                                                   | 0.13×0.11×0.06                                                   |

**Table S1 (cont.).** Crystal data, data collection and structure refinement details for **1-5**.

| Compound                                                                           | <b>1</b>                                                                     | <b>2</b>                                                                     | <b>3</b>                                                                     | <b>4</b>                                                                     | <b>5</b>                                                                     |
|------------------------------------------------------------------------------------|------------------------------------------------------------------------------|------------------------------------------------------------------------------|------------------------------------------------------------------------------|------------------------------------------------------------------------------|------------------------------------------------------------------------------|
| $\theta$ range for data collection, $^{\circ}$                                     | 2.100-26.500                                                                 | 2.082-34.364                                                                 | 2.896-77.730                                                                 | 1.923-35.932                                                                 | 4.162-77.969                                                                 |
| Index ranges                                                                       | -13 $\leq$ h $\leq$ 13,<br>-14 $\leq$ k $\leq$ 14,<br>-16 $\leq$ l $\leq$ 16 | -15 $\leq$ h $\leq$ 15,<br>-17 $\leq$ k $\leq$ 17,<br>-20 $\leq$ l $\leq$ 20 | -12 $\leq$ h $\leq$ 13,<br>-13 $\leq$ k $\leq$ 13,<br>-20 $\leq$ l $\leq$ 20 | -17 $\leq$ h $\leq$ 16,<br>-17 $\leq$ k $\leq$ 17,<br>-30 $\leq$ l $\leq$ 30 | -11 $\leq$ h $\leq$ 10,<br>-19 $\leq$ k $\leq$ 18,<br>-18 $\leq$ l $\leq$ 18 |
| Reflections                                                                        |                                                                              |                                                                              |                                                                              |                                                                              |                                                                              |
| Collected                                                                          | 50330                                                                        | 74295                                                                        | 42518                                                                        | 33922*                                                                       | 25821                                                                        |
| Independent [ $R_{\text{int}}$ ]                                                   | 5758 [0.0285]                                                                | 10083 [0.0191]                                                               | 7168 [0.0554]                                                                | 33922 [0]*                                                                   | 4290 [0.0530]                                                                |
| Observed (with $I > 2\sigma(I)$ )                                                  | 5497                                                                         | 9767                                                                         | 7158                                                                         | 30984                                                                        | 3910                                                                         |
| Completeness to $\theta_{\text{full}} / \theta_{\text{max}}$                       | 0.999 / 0.999                                                                | 0.998 / 0.999                                                                | 0.999 / 0.993                                                                | 1.000 / 0.926                                                                | 0.998 / 0.991                                                                |
| $T_{\text{max}} / T_{\text{min}}$                                                  | 0.7467 / 0.6658                                                              | 0.2711 / 0.1999                                                              | 0.951 / 0.021                                                                | 0.879 / 0.729                                                                | 1.0000 / 0.6667                                                              |
| Data / restraints / parameters                                                     | 5758 / 57 / 405                                                              | 10083 / 0 / 323                                                              | 7168 / 4 / 457                                                               | 33922 / 0 / 528                                                              | 4290 / 0 / 264                                                               |
| Goodness-of-fit on $F^2$                                                           | 1.233                                                                        | 1.135                                                                        | 1.079                                                                        | 1.105                                                                        | 1.066                                                                        |
| R1 / wR2 indices ( $I > 2\sigma(I)$ )                                              | 0.0406 / 0.0978                                                              | 0.0151 / 0.0412                                                              | 0.0421 / 0.1129                                                              | 0.0270 / 0.0901                                                              | 0.0326 / 0.0888                                                              |
| R1 / wR2 indices (all data)                                                        | 0.0425 / 0.0988                                                              | 0.0159 / 0.0416                                                              | 0.0421 / 0.1130                                                              | 0.0303 / 0.0937                                                              | 0.0359 / 0.0911                                                              |
| Extinction coefficient                                                             | -                                                                            | 0.0027(4)                                                                    | 0.0014(2)                                                                    | -                                                                            | -                                                                            |
| $\Delta\rho_{\text{max}} / \Delta\rho_{\text{min}}, \bar{e} \cdot \text{\AA}^{-3}$ | 2.465 / -1.170                                                               | 0.506 / -0.459                                                               | 1.573 / -1.834                                                               | 0.948 / -0.799                                                               | 1.033 / -1.199                                                               |
| CCDC number                                                                        | 2241142                                                                      | 2241143                                                                      | 2241144                                                                      | 2241145                                                                      | 2241146                                                                      |

\*\* Due to the refinement of **4** as a regular non-merohedral twin, equivalent reflections were merged by a conventional way, setting the collected reflection number to be equal to the number of independent reflections and, therefore, making  $R_{\text{int}}=0$ .

## 2. Crystal structure of **1**

The crystal composition of **1** is  $(C_{12}H_{17}N_3O_2Sn) \cdot 0.289(H_2O)$ . The asymmetric unit (Fig. S1) contains two non-equivalent molecules ( $Z'=2$ , see Figs. S2-S5) of the complex and water molecule with a partial occupancy. The coordination number of Sn ( $CN_{Sn}$ ) is five. In both molecules, the ligand is nearly flat (with exception of oxygen atoms coordinated with Sn), and the Sn atoms is disordered over two positions (Figs. S2 and S4). Atom deviations from the plane defined by atoms N1..N3, C1..C8 are  $-0.086(7)\text{\AA}$  for O1,  $0.083(9)\text{\AA}$  for O2,  $0.155(6)\text{\AA}$  for Sn1 and  $-0.44(3)\text{\AA}$  for O1A,  $0.37(4)\text{\AA}$  for O2A,  $-0.187(7)\text{\AA}$  for Sn1A for the first molecule. Atom deviations from the plane defined by atoms N4..N6, C13..C20 are  $-0.110(8)\text{\AA}$  for O3,  $0.116(6)\text{\AA}$  for O4,  $-0.232(5)\text{\AA}$  for Sn2 and  $0.15(12)\text{\AA}$  for O3A,  $0.25(4)\text{\AA}$  for O4A,  $-0.049(13)\text{\AA}$  for Sn2A for the second molecule. The Sn1/Sn1A atom exhibits a non-covalent short contact with the oxygen atom of the water molecule:  $2.904(7)\text{\AA}$  for Sn1...O5 and  $3.097(8)\text{\AA}$  for Sn1A...O5. The hydrogen bonds (Table S4) form 3D-network (not shown) in the crystal lattice.

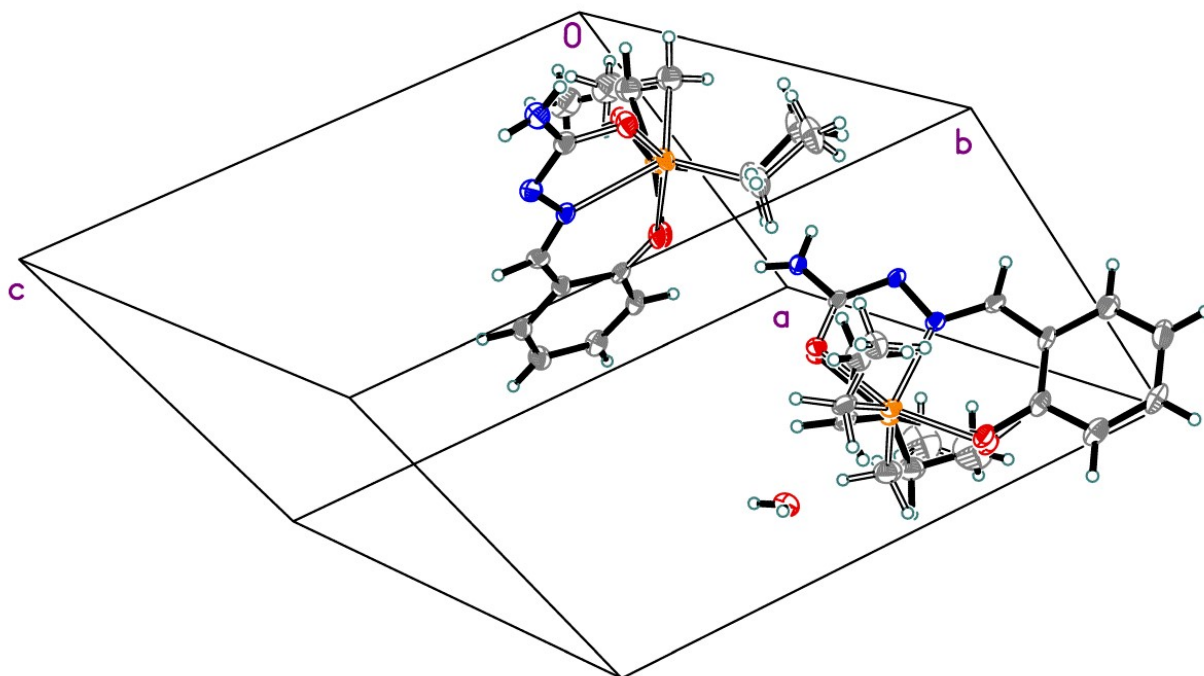

**Fig. S1.** The asymmetric unit of **1** ( $p=50\%$ ). The occupancy of the water molecule is  $0.579(14)$ .

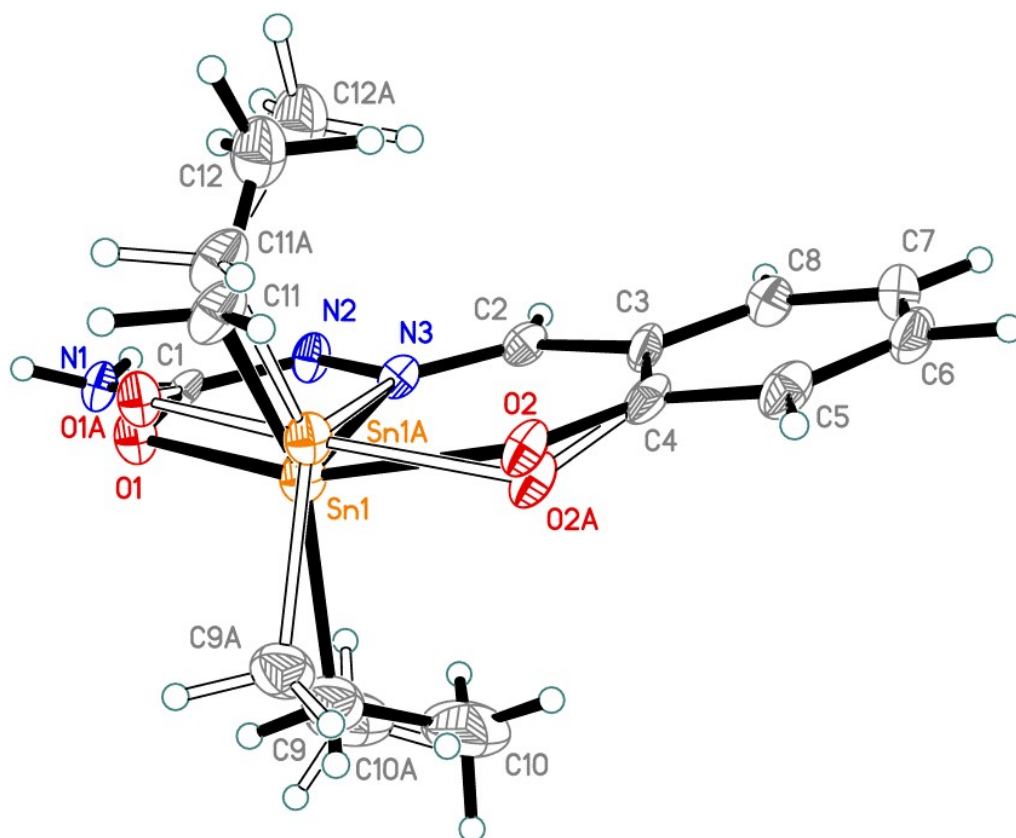

**Fig. S2.** The first molecule of **1** (p=50%). The minor disorder component is shown with open solid lines. The disorder ratio is 0.776(9):0.224(9).

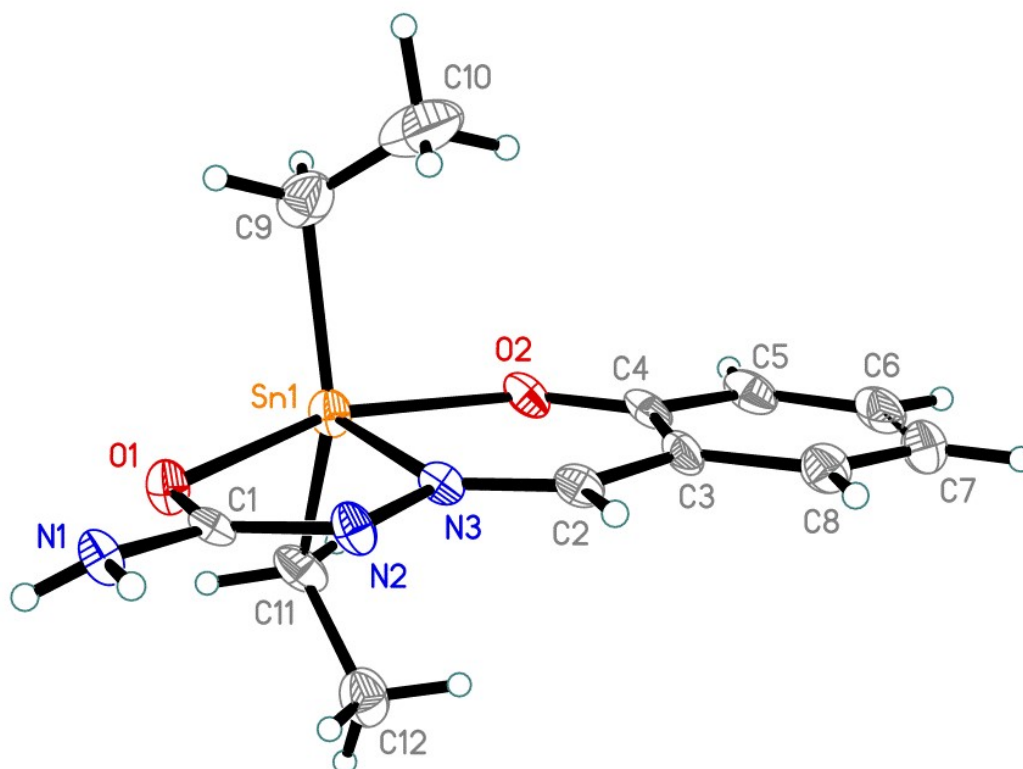

**Fig. S3.** The first molecule of **1** (p=50%). The disorder is omitted.

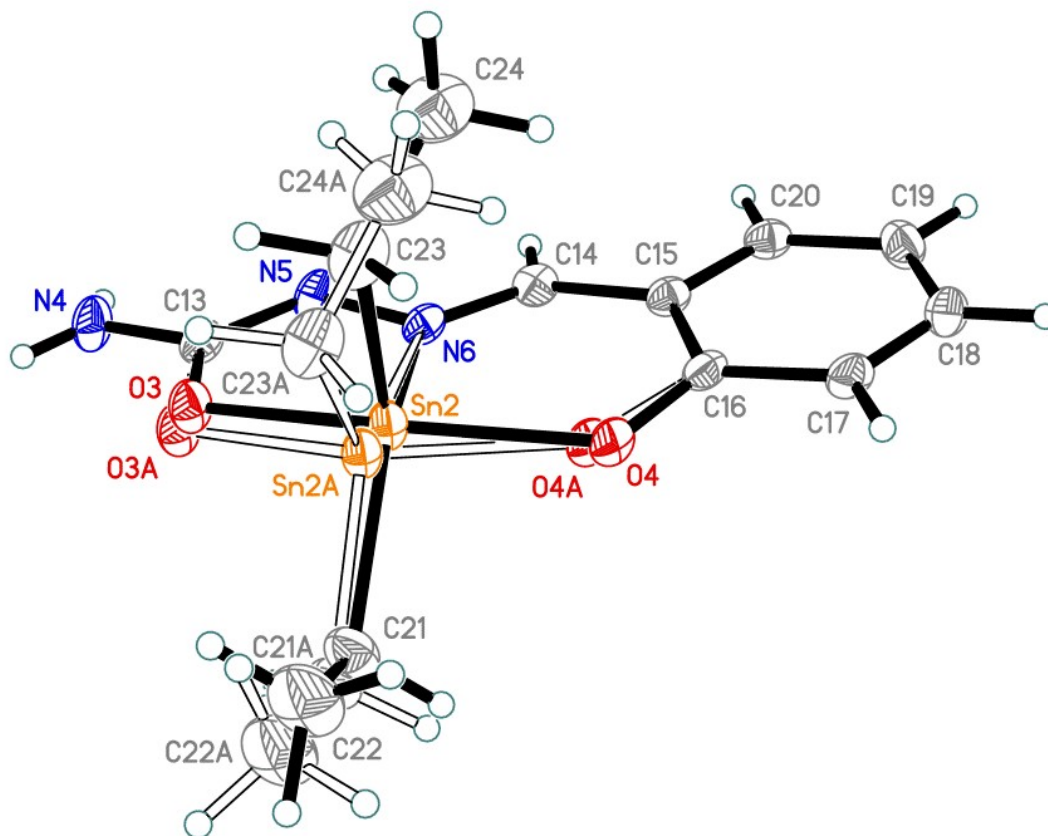

**Fig. S4.** The second molecule of **1** ( $p=50\%$ ). The minor disorder component is shown with open solid lines. The disorder ratio is 0.920(9):0.080(9).

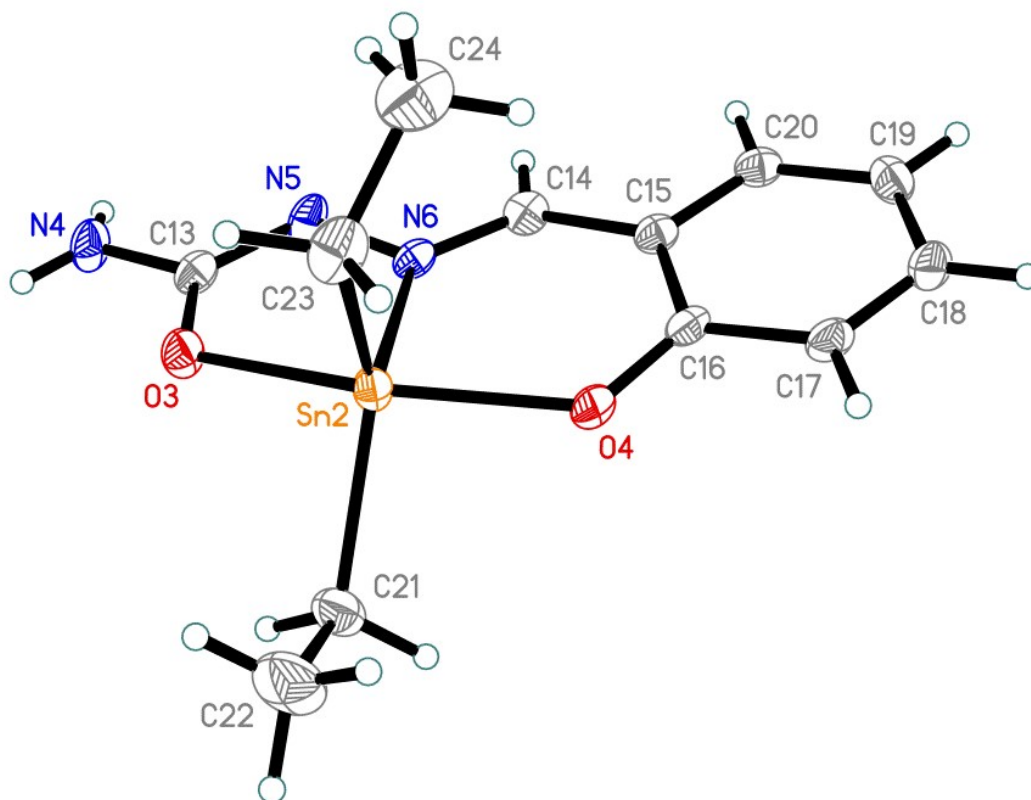

**Fig. S5.** The second molecule of **1** ( $p=50\%$ ). The disorder is omitted.



**Table S2.** Selected bond distances for **1**, Å.

|           |           |         |           |           |           |
|-----------|-----------|---------|-----------|-----------|-----------|
| Sn1-O1    | 2.164(5)  | O2-C4   | 1.318(12) | C3-C8     | 1.403(7)  |
| Sn1-O2    | 2.136(6)  | O1A-C1  | 1.302(17) | C3-C4     | 1.418(7)  |
| Sn1-N3    | 2.209(4)  | O2A-C4  | 1.36(4)   | C4-C5     | 1.410(7)  |
| Sn1-C9    | 2.133(8)  | N1-C1   | 1.353(6)  | C5-C6     | 1.372(8)  |
| Sn1-C11   | 2.117(7)  | N1-H1A  | 0.81(3)   | C6-C7     | 1.397(8)  |
| Sn1A-O1A  | 2.164(16) | N1-H1B  | 0.81(3)   | C7-C8     | 1.383(7)  |
| Sn1A-O2A  | 2.127(16) | N2-C1   | 1.327(6)  | C9-C10    | 1.506(14) |
| Sn1A-N3   | 2.138(6)  | N2-N3   | 1.389(5)  | C11-C12   | 1.528(11) |
| Sn1A-C9A  | 2.126(18) | N3-C2   | 1.296(6)  | C9A-C10A  | 1.50(2)   |
| Sn1A-C11A | 2.117(18) | C2-C3   | 1.446(6)  | C11A-C12A | 1.51(2)   |
| O1-C1     | 1.300(7)  |         |           |           |           |
| Sn2-O3    | 2.146(4)  | O4-C16  | 1.330(6)  | C15-C20   | 1.394(7)  |
| Sn2-O4    | 2.094(4)  | O3A-C13 | 1.30(2)   | C15-C16   | 1.421(6)  |
| Sn2-N6    | 2.164(4)  | O4A-C16 | 1.376(16) | C16-C17   | 1.404(6)  |
| Sn2-C21   | 2.147(6)  | N4-C13  | 1.344(6)  | C17-C18   | 1.371(7)  |
| Sn2-C23   | 2.111(7)  | N4-H4A  | 0.81(3)   | C18-C19   | 1.393(7)  |
| Sn2A-O3A  | 2.15(2)   | N4-H4B  | 0.81(3)   | C19-C20   | 1.387(7)  |
| Sn2A-O4A  | 2.140(17) | N5-C13  | 1.328(6)  | C21-C22   | 1.509(8)  |
| Sn2A-N6   | 2.354(11) | N5-N6   | 1.389(5)  | C23-C24   | 1.556(10) |
| Sn2A-C21A | 2.15(2)   | N6-C14  | 1.295(6)  | C21A-C22A | 1.51(2)   |
| Sn2A-C23A | 2.11(2)   | C14-C15 | 1.443(6)  | C23A-C24A | 1.55(2)   |
| O3-C13    | 1.294(6)  |         |           |           |           |
| O5-H5A    | 0.86(2)   | O5-H5B  | 0.83(2)   |           |           |

**Table S3.** Selected bond angles for **1**, °.

|            |           |               |           |
|------------|-----------|---------------|-----------|
| O1-Sn1-N3  | 73.16(18) | O1A-Sn1A-N3   | 72.0(6)   |
| O2-Sn1-N3  | 82.1(4)   | O2A-Sn1A-N3   | 86.6(14)  |
| O1-Sn1-O2  | 154.2(4)  | O1A-Sn1A-O2A  | 157.8(15) |
| O1-Sn1-C9  | 99.0(3)   | O1A-Sn1A-C9A  | 94.0(12)  |
| O1-Sn1-C11 | 93.0(3)   | O1A-Sn1A-C11A | 89.2(15)  |
| O2-Sn1-C9  | 93.7(3)   | O2A-Sn1A-C9A  | 86.8(14)  |
| O2-Sn1-C11 | 89.5(4)   | O2A-Sn1A-C11A | 106.1(18) |
| C9-Sn1-N3  | 104.0(2)  | C9A-Sn1A-N3   | 107.3(8)  |
| C11-Sn1-N3 | 111.7(2)  | C11A-Sn1A-N3  | 117.2(10) |
| C9-Sn1-C11 | 144.3(3)  | C9A-Sn1A-C11A | 134.0(13) |
| O3-Sn2-N6  | 73.00(16) | O3A-Sn2A-N6   | 73.7(9)   |
| O4-Sn2-N6  | 85.33(17) | O4A-Sn2A-N6   | 69.9(16)  |
| O2-Sn2-O4  | 155.9(2)  | O3A-Sn2A-O4A  | 141(3)    |

|             |          |                |        |
|-------------|----------|----------------|--------|
| O3-Sn2-C21  | 91.3(2)  | O3A-Sn2A-C21A  | 92(4)  |
| O3-Sn2-C23  | 98.8(3)  | O3A-Sn2A-C23A  | 105(4) |
| O4-Sn2-C21  | 94.1(2)  | O4A-Sn2A-C21A  | 100(3) |
| O4-Sn2-C23  | 97.5(2)  | O4A-Sn2A-C23A  | 104(3) |
| C21-Sn2-N6  | 128.3(2) | C21A-Sn2A-N6   | 128(2) |
| C23-Sn2-N6  | 107.2(2) | C23A-Sn2A-N6   | 120(2) |
| C21-Sn2-C23 | 124.1(3) | C21A-Sn2A-C23A | 113(3) |

**Table S4.** Hydrogen bond parameters for **1**, Å and °.

| D-H...A       | d(D-H)  | d(H...A) | d(D...A) | <(DHA)  |
|---------------|---------|----------|----------|---------|
| N1-H1A...O4   | 0.81(3) | 2.25(4)  | 3.020(5) | 159(5)  |
| N1-H1A...O4A  | 0.81(3) | 2.46(5)  | 3.23(4)  | 159(5)  |
| N1-H1B...N2#1 | 0.81(3) | 2.20(3)  | 3.012(5) | 175(6)  |
| N4-H4A...N5#2 | 0.81(3) | 2.19(3)  | 3.002(6) | 176(6)  |
| N4-H4B...O1#3 | 0.81(3) | 2.51(5)  | 3.155(7) | 137(6)  |
| O5-H5B...N5#4 | 0.83(2) | 2.36(4)  | 3.166(8) | 163(11) |

Symmetry transformations to generate equivalent atoms: #1 -x+1, -y+1, -z; #2 -x, -y+1, -z+1; #3 x-1, y, z; #4 -x+1, -y+1, -z+1.

### 3. Crystal structure of **2**

In complex **2** (Fig. S6), the ligand is not flat, whereas 1,10-phenanthroline is planar. Since atoms Sn1, O1, O2, N3, N4 and N5 are located in the same plane, and angle C9-Sn1-C11 (Table 6) is close to 180°, atom Sn1 is in a distorted pentagonal bipyramidal environment. The lattice methanol molecule is coordinated to atom N2 *via* a hydrogen bond. An additional hydrogen bond of the amino group forms a dimeric unit (Fig. S7).

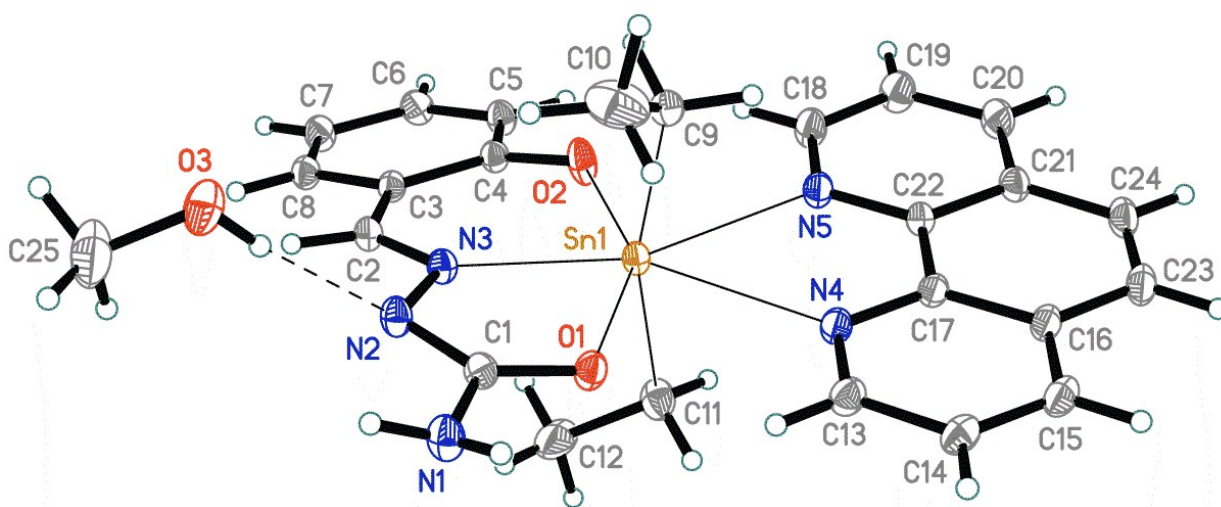

**Fig. S6.** The asymmetric unit of **2** (p=50%).

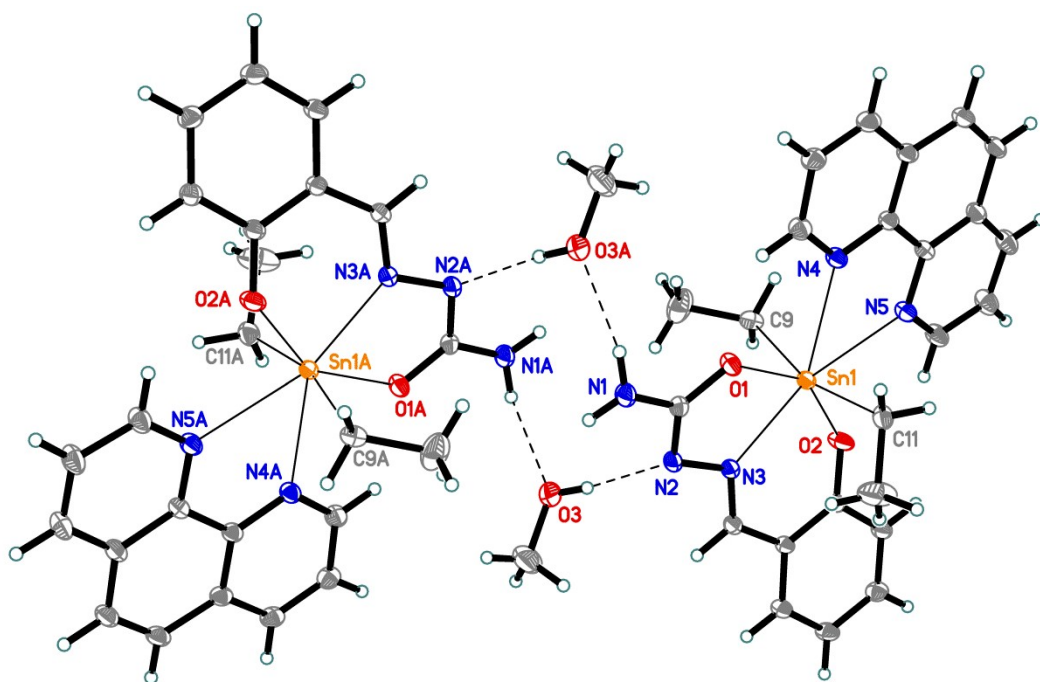

**Fig. S7.** A dimeric moiety of **2** formed by hydrogen bonds ( $p=50\%$ ). Symmetry transformation (A) to generate equivalent atoms:  $-x+1, -y, -z+2$ .

**Table S5.** Selected bond distances for **2**, Å.

|         |            |         |            |         |            |
|---------|------------|---------|------------|---------|------------|
| Sn1-O1  | 2.2191(6)  | N3-C2   | 1.2956(10) | C13-C14 | 1.4045(12) |
| Sn1-O2  | 2.1509(6)  | C2-C3   | 1.4460(11) | C14-C15 | 1.3718(13) |
| Sn1-N3  | 2.3154(7)  | C3-C8   | 1.4050(11) | C15-C16 | 1.4080(12) |
| Sn1-N4  | 2.6683(7)  | C3-C4   | 1.4219(11) | C16-C17 | 1.4120(11) |
| Sn1-N5  | 2.6456(7)  | C4-C5   | 1.4110(11) | C16-C23 | 1.4339(12) |
| Sn1-C9  | 2.1333(9)  | C5-C6   | 1.3857(12) | C17-C22 | 1.4465(11) |
| Sn1-C11 | 2.1286(9)  | C6-C7   | 1.3967(12) | C18-C19 | 1.4035(12) |
| O1-C1   | 1.2804(10) | C7-C8   | 1.3846(12) | C19-C20 | 1.3737(14) |
| O2-C4   | 1.3159(10) | C9-C10  | 1.5188(15) | C20-C21 | 1.4089(13) |
| N1-C1   | 1.3648(11) | C11-C12 | 1.5015(14) | C21-C22 | 1.4142(11) |
| N1-H1A  | 0.859(16)  | N4-C13  | 1.3310(11) | C21-C24 | 1.4336(12) |
| N1-H1B  | 0.859(16)  | N4-C17  | 1.3608(10) | C23-C24 | 1.3555(14) |
| N2-C1   | 1.3318(10) | N5-C18  | 1.3281(11) | O3-C25  | 1.3984(15) |
| N2-N3   | 1.3910(10) | N5-C22  | 1.3609(10) | O3-H3   | 0.834(17)  |

**Table S6.** Selected bond angles for **2**, °.

|           |           |            |           |            |           |
|-----------|-----------|------------|-----------|------------|-----------|
| O1-Sn1-N3 | 69.32(2)  | C9-Sn1-O1  | 93.31(3)  | C9-Sn1-N4  | 82.34(3)  |
| O2-Sn1-N3 | 78.86(2)  | C9-Sn1-O2  | 91.63(3)  | C11-Sn1-N4 | 83.30(3)  |
| O1-Sn1-O2 | 148.16(2) | C11-Sn1-O1 | 90.65(3)  | C9-Sn1-N5  | 81.05(3)  |
| O1-Sn1-N4 | 73.64(2)  | C11-Sn1-O2 | 93.50(4)  | C11-Sn1-N5 | 84.86(3)  |
| O2-Sn1-N4 | 138.19(2) | C9-Sn1-C11 | 163.37(3) | N3-Sn1-N4  | 142.88(2) |
| O1-Sn1-N5 | 135.88(2) | C9-Sn1-N3  | 97.22(3)  | N3-Sn1-N5  | 154.68(2) |
| O2-Sn1-N5 | 75.95(2)  | C11-Sn1-N3 | 99.29(3)  | N5-Sn1-N4  | 62.24(2)  |

**Table S7.** Hydrogen bond parameters for **2**, Å and °.

| D-H...A       | d(D-H)    | d(H...A)  | d(D...A)   | <(DHA)    |
|---------------|-----------|-----------|------------|-----------|
| N1-H1B...O3#1 | 0.859(16) | 2.104(15) | 2.9289(11) | 160.7(13) |
| O3-H3...N2    | 0.834(17) | 1.908(17) | 2.7377(10) | 172.8(17) |

Symmetry transformations to generate equivalent atoms: #1 -x+1, -y, -z+2

#### 4. Crystal structure of **3**

The asymmetric unit of **3** (Fig. S8) contains the complex (Fig. S9), methanol and an additional 1,10-phenanthroline molecule. Two such units form a dimeric associate *via* H-bonding (Fig. S10).

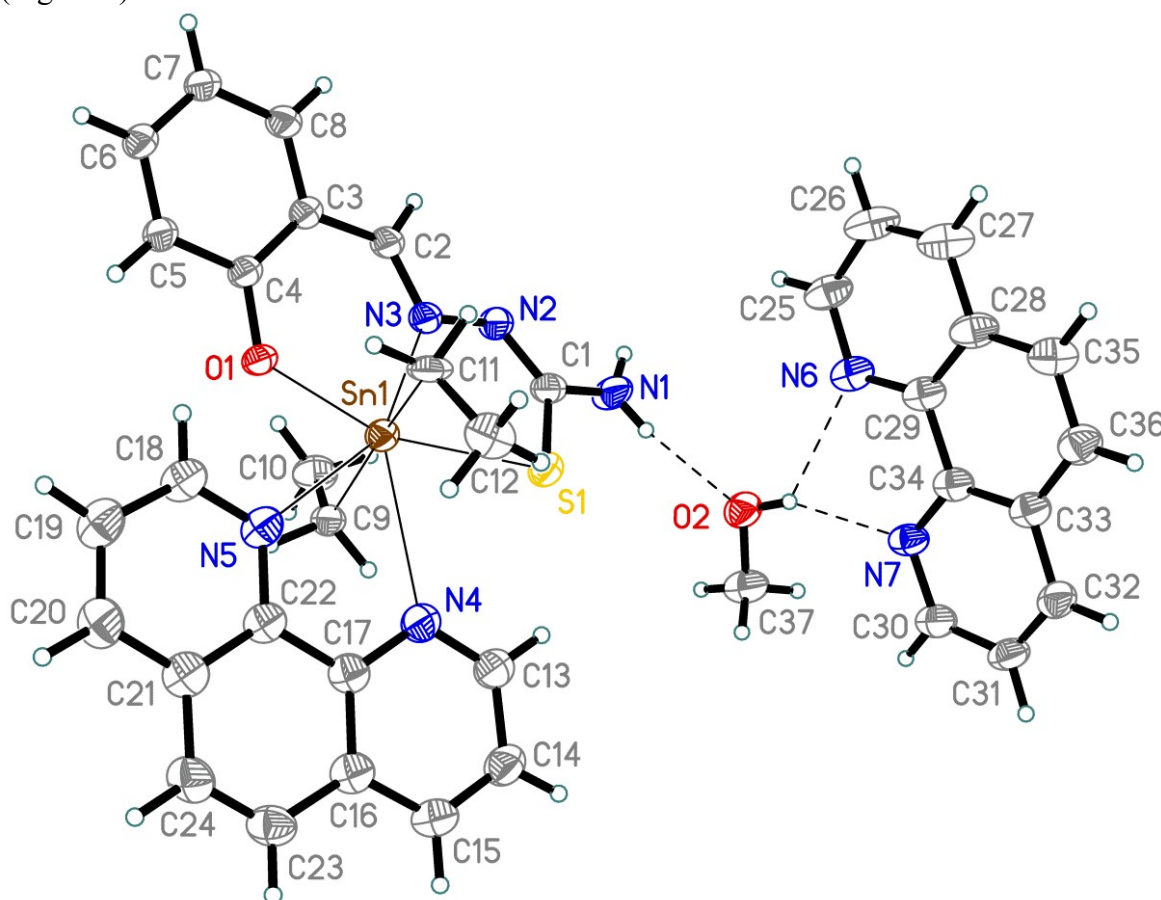**Fig. S8.** The asymmetric unit of **3** (p=50%). Disorder of one ethyl ligand is omitted.

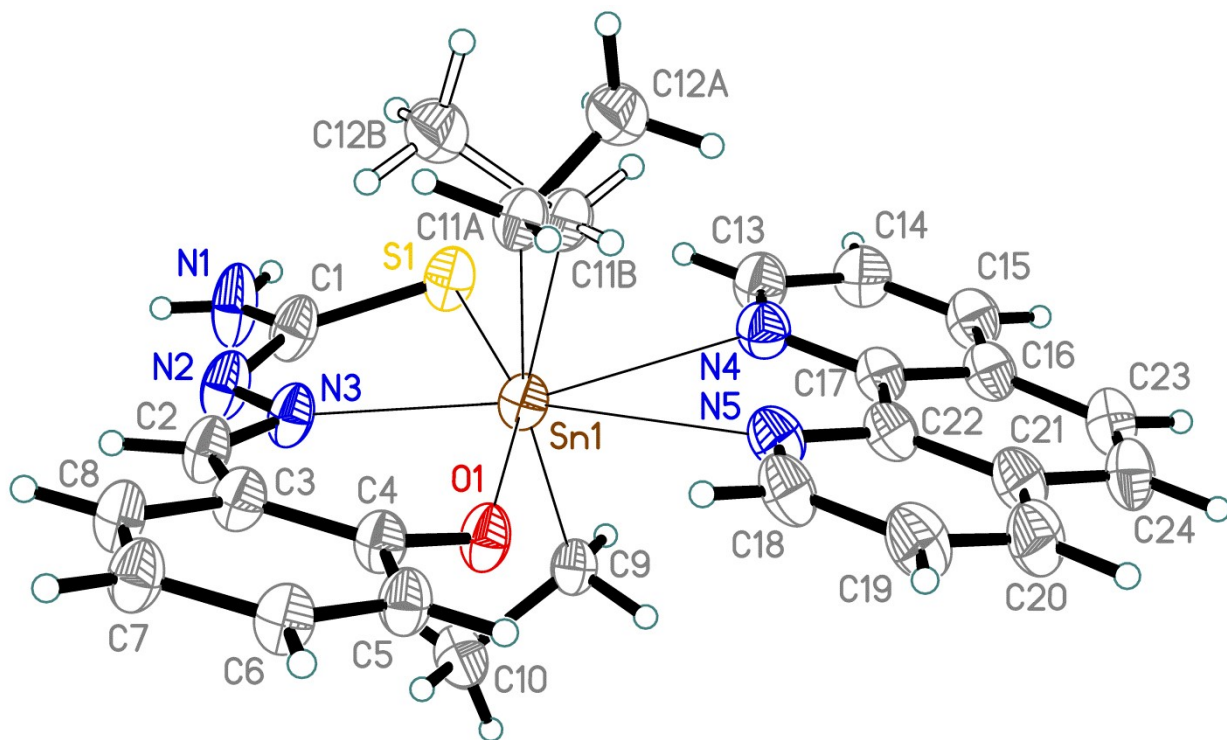

**Fig. S9.** The structure of complex in crystals of **3** ( $p=50\%$ ). The disorder ratio for one ethyl ligand (C11A, C12A / C11B, C12B) is 0.606(6):0.394(6).

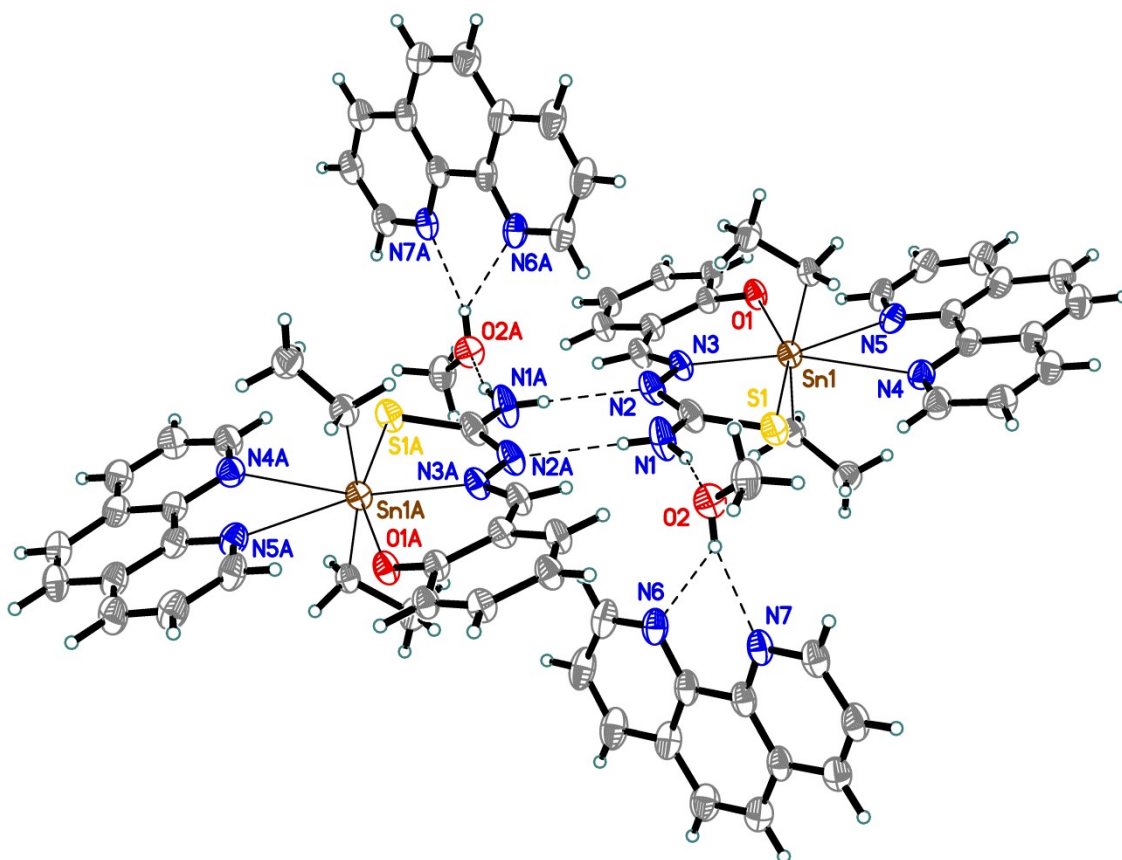

**Fig. S10.** The dimeric unit of **3**, formed by hydrogen bonds ( $p=50\%$ ). Disorder is omitted.

**Table S8.** Selected bond distances for **3**, Å.

|          |            |           |          |         |          |
|----------|------------|-----------|----------|---------|----------|
| Sn1-S1   | 2.6494(6)  | N2-C1     | 1.314(4) | N5-C18  | 1.330(4) |
| Sn1-O1   | 2.1236(18) | N3-C2     | 1.291(3) | N5-C22  | 1.362(4) |
| Sn1-N3   | 2.331(2)   | C2-C3     | 1.444(4) | C13-C14 | 1.409(4) |
| Sn1-C9   | 2.125(3)   | C3-C4     | 1.416(4) | C14-C15 | 1.361(5) |
| Sn1-C11A | 2.137(3)   | C3-C8     | 1.404(4) | C15-C16 | 1.414(4) |
| Sn1-C11B | 2.137(4)   | C4-C5     | 1.419(3) | C16-C17 | 1.411(4) |
| Sn1-N4   | 2.945(2)   | C5-C6     | 1.384(4) | C16-C23 | 1.427(4) |
| Sn1-N5   | 2.743(3)   | C6-C7     | 1.392(4) | C17-C22 | 1.445(4) |
| S1-C1    | 1.731(3)   | C7-C8     | 1.382(4) | C18-C19 | 1.400(5) |
| O1-C4    | 1.317(3)   | C9-C10    | 1.525(4) | C19-C20 | 1.367(5) |
| N1-H1A   | 0.80(3)    | C11A-C12A | 1.528(6) | C20-C21 | 1.408(4) |
| N1-H1B   | 0.80(3)    | C11B-C12B | 1.529(6) | C21-C22 | 1.410(4) |
| N1-C1    | 1.351(4)   | N4-C13    | 1.319(4) | C21-C24 | 1.439(4) |
| N2-N3    | 1.398(3)   | N4-C17    | 1.369(4) | C23-C24 | 1.343(5) |

**Table S9.** Selected bond angles for **3**, °.

|             |           |             |           |             |           |
|-------------|-----------|-------------|-----------|-------------|-----------|
| S1-Sn1-N4   | 75.51(5)  | N3-Sn1-S1   | 73.14(6)  | C11A-Sn1-S1 | 92.8(2)   |
| S1-Sn1-N5   | 132.58(5) | N3-Sn1-N4   | 148.26(7) | C11A-Sn1-N3 | 92.89(18) |
| O1-Sn1-S1   | 152.03(5) | N3-Sn1-N5   | 153.94(7) | C11A-Sn1-N4 | 93.47(14) |
| O1-Sn1-N3   | 79.39(7)  | C9-Sn1-S1   | 91.83(7)  | C11A-Sn1-N5 | 82.9(2)   |
| O1-Sn1-C9   | 88.04(9)  | C9-Sn1-N3   | 100.65(9) | C11B-Sn1-S1 | 94.6(4)   |
| O1-Sn1-C11A | 93.8(2)   | C9-Sn1-C11A | 166.4(2)  | C11B-Sn1-N3 | 104.7(2)  |
| O1-Sn1-C11B | 97.4(4)   | C9-Sn1-C11B | 154.6(2)  | C11B-Sn1-N4 | 82.6(3)   |
| O1-Sn1-N4   | 131.05(7) | C9-Sn1-N4   | 75.38(8)  | C11B-Sn1-N5 | 73.0(3)   |
| O1-Sn1-N5   | 75.27(7)  | C9-Sn1-N5   | 84.57(9)  | N5-Sn1-N4   | 57.79(7)  |

**Table S10.** Hydrogen bond parameters for **3**, Å and °.

| D-H...A       | d(D-H)  | d(H...A) | d(D...A) | <(DHA) |
|---------------|---------|----------|----------|--------|
| N1-H1A...N2#1 | 0.80(3) | 2.28(3)  | 3.074(4) | 179(5) |
| N1-H1B...O2   | 0.80(3) | 2.17(4)  | 2.909(3) | 155(5) |
| O2-H2A...N6   | 0.89(5) | 2.44(5)  | 3.107(3) | 133(4) |
| O2-H2A...N7   | 0.89(5) | 2.14(5)  | 2.967(3) | 154(4) |

Symmetry transformations to generate equivalent atoms: #1 -x+1, -y+2, -z+2.



## 5. Crystal structure of 4

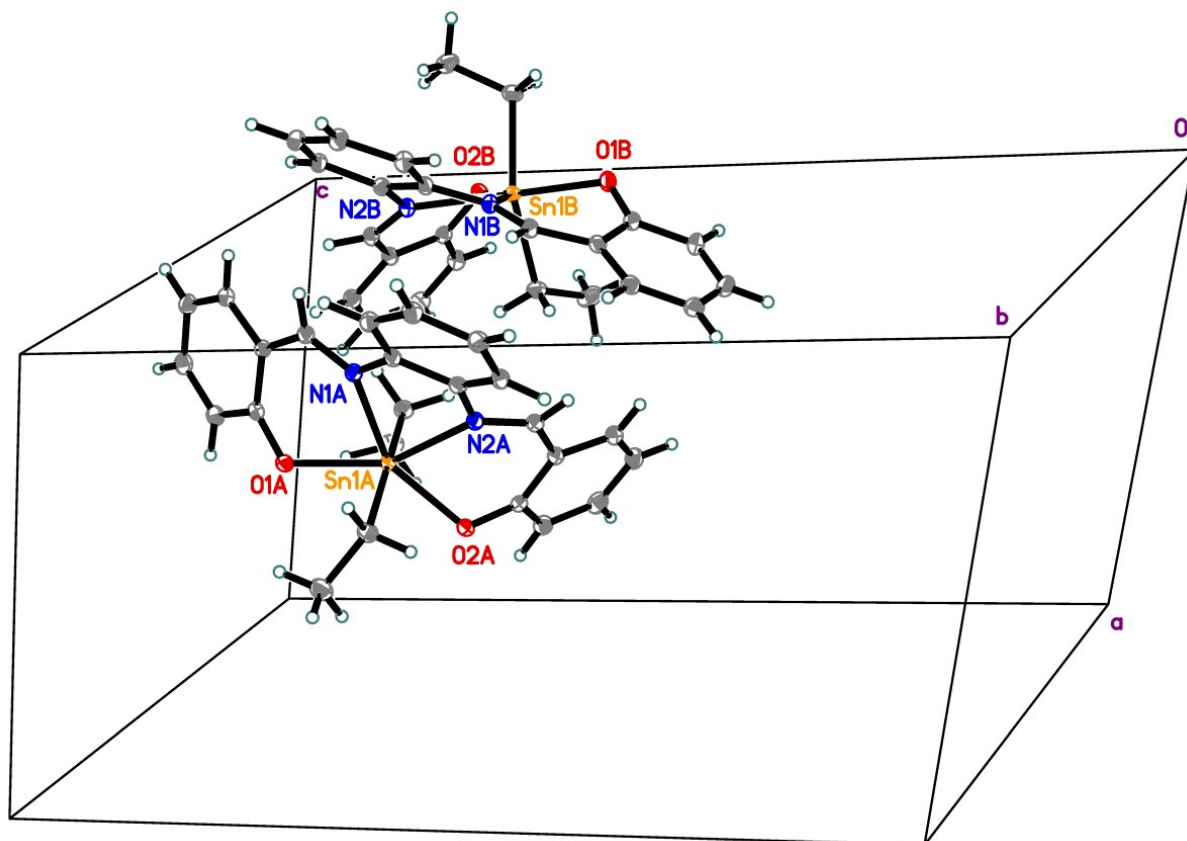

**Fig. S11.** The asymmetric unit of 4 contains two crystallographically non-equivalent molecules of the complex ( $p=50\%$ ).

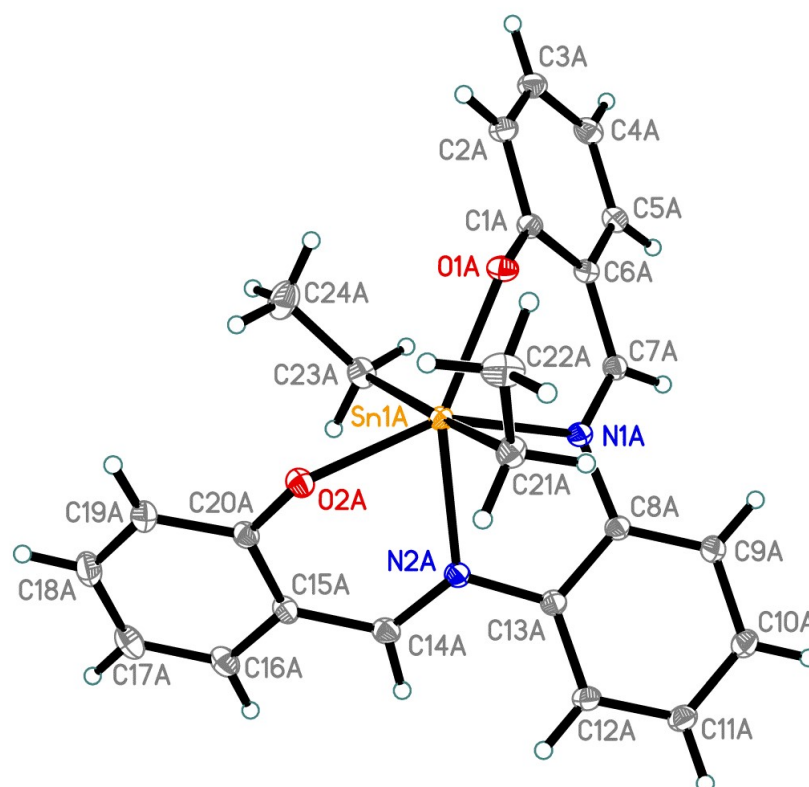

**Fig. S12.** The first molecule of 4 ( $p=50\%$ ).

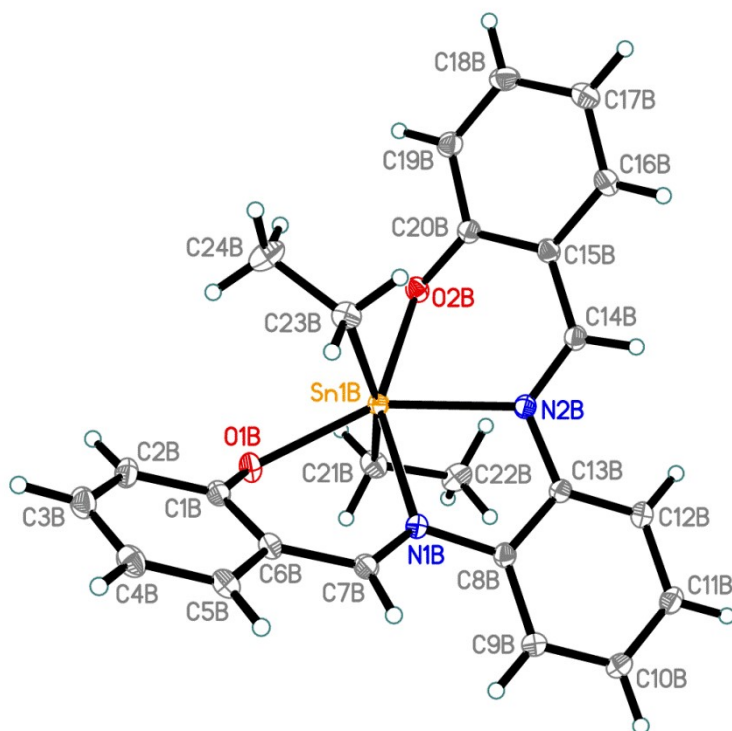

**Fig. S13.** The second molecule of **4** (p=50%).

**Table S11.** Selected bond distances for **4**, Å.

|           |            |           |            |           |            |
|-----------|------------|-----------|------------|-----------|------------|
| Sn1A-O1A  | 2.1960(10) | C1A-C2A   | 1.4209(19) | C12A-C13A | 1.3954(19) |
| Sn1A-O2A  | 2.2105(10) | C1A-C6A   | 1.4346(19) | C14A-C15A | 1.4355(19) |
| Sn1A-N1A  | 2.2981(11) | C2A-C3A   | 1.380(2)   | C15A-C16A | 1.418(2)   |
| Sn1A-N2A  | 2.2758(12) | C3A-C4A   | 1.405(2)   | C15A-C20A | 1.4331(19) |
| Sn1A-C21A | 2.1349(15) | C4A-C5A   | 1.379(2)   | C16A-C17A | 1.379(2)   |
| Sn1A-C23A | 2.1358(15) | C5A-C6A   | 1.416(2)   | C17A-C18A | 1.405(2)   |
| O1A-C1A   | 1.3078(18) | C6A-C7A   | 1.4386(19) | C18A-C19A | 1.381(2)   |
| O2A-C20A  | 1.3139(17) | C8A-C9A   | 1.3976(18) | C19A-C20A | 1.4154(19) |
| N1A-C7A   | 1.3054(19) | C8A-C13A  | 1.4120(19) | C21A-C22A | 1.521(2)   |
| N1A-C8A   | 1.4138(17) | C9A-C10A  | 1.393(2)   | C23A-C24A | 1.534(2)   |
| N2A-C13A  | 1.4110(17) | C10A-C11A | 1.393(2)   |           |            |
| N2A-C14A  | 1.3034(18) | C11A-C12A | 1.3898(19) |           |            |
| Sn1B-O1B  | 2.2127(10) | C1B-C2B   | 1.423(2)   | C12B-C13B | 1.3951(19) |
| Sn1B-O2B  | 2.2275(10) | C1B-C6B   | 1.436(2)   | C14B-C15B | 1.4323(19) |
| Sn1B-N1B  | 2.3040(12) | C2B-C3B   | 1.379(2)   | C15B-C16B | 1.416(2)   |
| Sn1B-N2B  | 2.2719(12) | C3B-C4B   | 1.402(2)   | C15B-C20B | 1.4332(19) |
| Sn1B-C21B | 2.1334(15) | C4B-C5B   | 1.381(2)   | C16B-C17B | 1.378(2)   |
| Sn1B-C23B | 2.1365(14) | C5B-C6B   | 1.415(2)   | C17B-C18B | 1.407(2)   |



|          |            |           |            |           |            |
|----------|------------|-----------|------------|-----------|------------|
| O1B-C1B  | 1.2983(18) | C6B-C7B   | 1.4407(19) | C18B-C19B | 1.383(2)   |
| O2B-C20B | 1.3109(17) | C8B-C9B   | 1.4006(18) | C19B-C20B | 1.4172(19) |
| N1B-C7B  | 1.3013(19) | C8B-C13B  | 1.407(2)   | C21B-C22B | 1.528(2)   |
| N1B-C8B  | 1.4136(17) | C9B-C10B  | 1.394(2)   | C23B-C24B | 1.535(2)   |
| N2B-C13B | 1.4099(17) | C10B-C11B | 1.394(2)   |           |            |
| N2B-C14B | 1.3061(18) | C11B-C12B | 1.3877(19) |           |            |

**Table S12.** Selected bond angles for **4**, °.

|               |           |                |           |
|---------------|-----------|----------------|-----------|
| O1A-Sn1A-O2A  | 130.72(4) | C21A-Sn1A-N1A  | 94.57(5)  |
| O1A-Sn1A-N1A  | 78.93(4)  | C21A-Sn1A-N2A  | 91.32(5)  |
| O1A-Sn1A-N2A  | 149.51(4) | C21A-Sn1A-C23A | 170.39(6) |
| O2A-Sn1A-N1A  | 150.34(4) | C23A-Sn1A-O1A  | 88.98(5)  |
| O2A-Sn1A-N2A  | 79.64(4)  | C23A-Sn1A-O2A  | 87.31(5)  |
| N2A-Sn1A-N1A  | 70.78(4)  | C23A-Sn1A-N1A  | 93.60(5)  |
| C21A-Sn1A-O1A | 87.64(5)  | C23A-Sn1A-N2A  | 96.13(5)  |
| C21A-Sn1A-O2A | 88.08(5)  |                |           |
| O1B-Sn1B-O2B  | 132.80(4) | C21B-Sn1B-N1B  | 98.10(5)  |
| O1B-Sn1B-N1B  | 78.00(4)  | C21B-Sn1B-N2B  | 97.68(5)  |
| O1B-Sn1B-N2B  | 148.66(4) | C21B-Sn1B-C23B | 161.39(6) |
| O2B-Sn1B-N1B  | 149.19(4) | C23B-Sn1B-O1B  | 87.71(5)  |
| O2B-Sn1B-N2B  | 78.46(4)  | C23B-Sn1B-O2B  | 86.84(5)  |
| N2B-Sn1B-N1B  | 70.74(4)  | C23B-Sn1B-N1B  | 96.63(5)  |
| C21B-Sn1B-O1B | 84.30(5)  | C23B-Sn1B-N2B  | 97.88(5)  |
| C21B-Sn1B-O2B | 86.33(5)  |                |           |

## 6. Crystal structure of 5

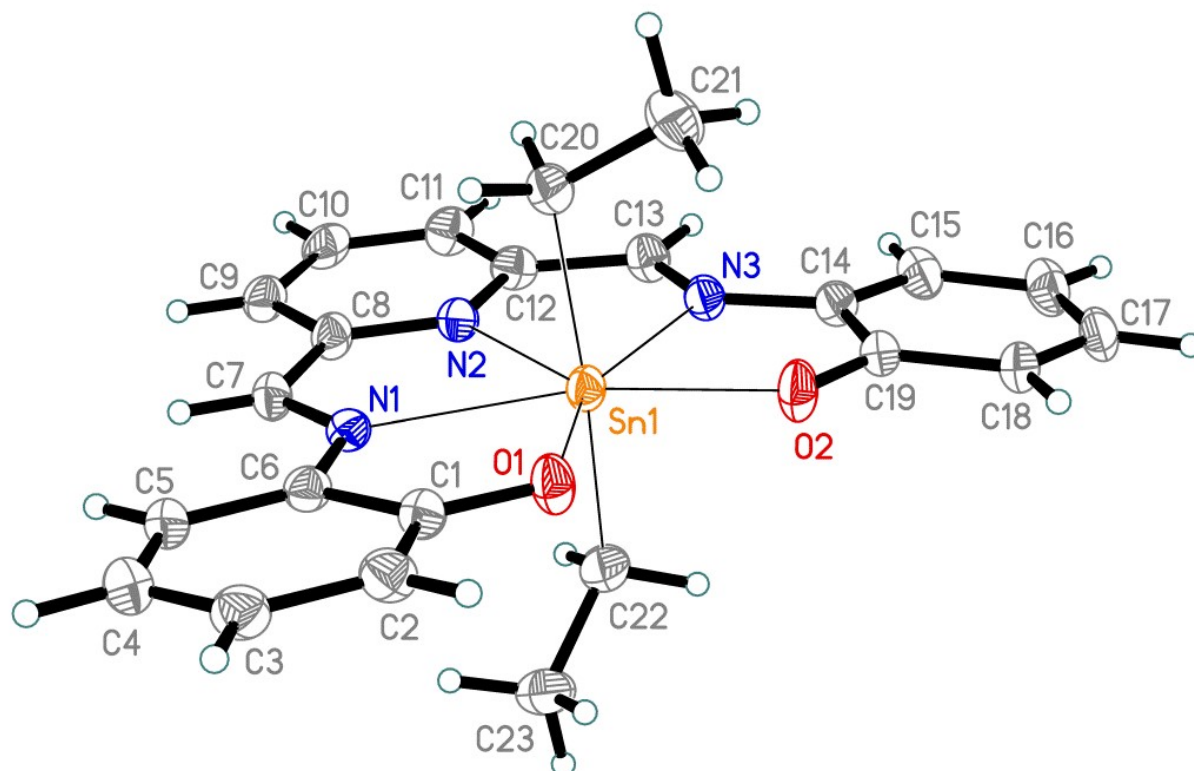

**Fig. S14.** The molecular structure of **5** (p=50%).

**Table S13.** Selected bond distances for **5**, Å.

|         |          |        |          |         |          |
|---------|----------|--------|----------|---------|----------|
| Sn1-O1  | 2.168(2) | N2-C12 | 1.334(4) | C10-C11 | 1.392(4) |
| Sn1-O2  | 2.167(2) | N3-C13 | 1.282(4) | C11-C12 | 1.402(4) |
| Sn1-N1  | 2.416(2) | N3-C14 | 1.402(4) | C12-C13 | 1.469(4) |
| Sn1-N2  | 2.435(3) | C1-C2  | 1.420(4) | C14-C15 | 1.393(4) |
| Sn1-N3  | 2.415(2) | C1-C6  | 1.425(4) | C14-C19 | 1.420(4) |
| Sn1-C20 | 2.139(3) | C2-C3  | 1.377(4) | C15-C16 | 1.386(4) |
| Sn1-C22 | 2.138(3) | C3-C4  | 1.402(4) | C16-C17 | 1.398(5) |
| O1-C1   | 1.308(3) | C4-C5  | 1.377(4) | C17-C18 | 1.374(5) |
| O2-C19  | 1.307(4) | C5-C6  | 1.402(4) | C18-C19 | 1.422(4) |
| N1-C6   | 1.399(4) | C7-C8  | 1.470(4) | C20-C21 | 1.528(4) |
| N1-C7   | 1.279(4) | C8-C9  | 1.396(4) | C22-C23 | 1.517(5) |
| N2-C8   | 1.344(4) | C9-C10 | 1.389(4) |         |          |

**Table S14.** Selected bond angles for **5**, °.

|           |           |            |           |             |            |
|-----------|-----------|------------|-----------|-------------|------------|
| O1-Sn1-N1 | 71.95(8)  | N1-Sn1-N2  | 65.63(8)  | C20-Sn1-N3  | 90.30(10)  |
| O1-Sn1-N2 | 137.56(8) | N3-Sn1-N1  | 131.30(8) | C22-Sn1-O1  | 94.94(11)  |
| O1-Sn1-N3 | 156.75(8) | N3-Sn1-N2  | 65.69(8)  | C22-Sn1-O2  | 91.45(11)  |
| O2-Sn1-O1 | 84.81(8)  | C20-Sn1-O1 | 91.16(11) | C22-Sn1-N1  | 89.57(10)  |
| O2-Sn1-N1 | 156.74(8) | C20-Sn1-O2 | 94.28(10) | C22-Sn1-N2  | 86.30(11)  |
| O2-Sn1-N2 | 137.62(8) | C20-Sn1-N1 | 87.37(9)  | C22-Sn1-N3  | 86.15(11)  |
| O2-Sn1-N3 | 71.94(8)  | C20-Sn1-N2 | 85.69(10) | C22-Sn1-C20 | 171.98(13) |

**7.  $^1\text{H}$ ,  $^{13}\text{C}$  and  $^{119}\text{Sn}$  NMR Spectra for 1-5**

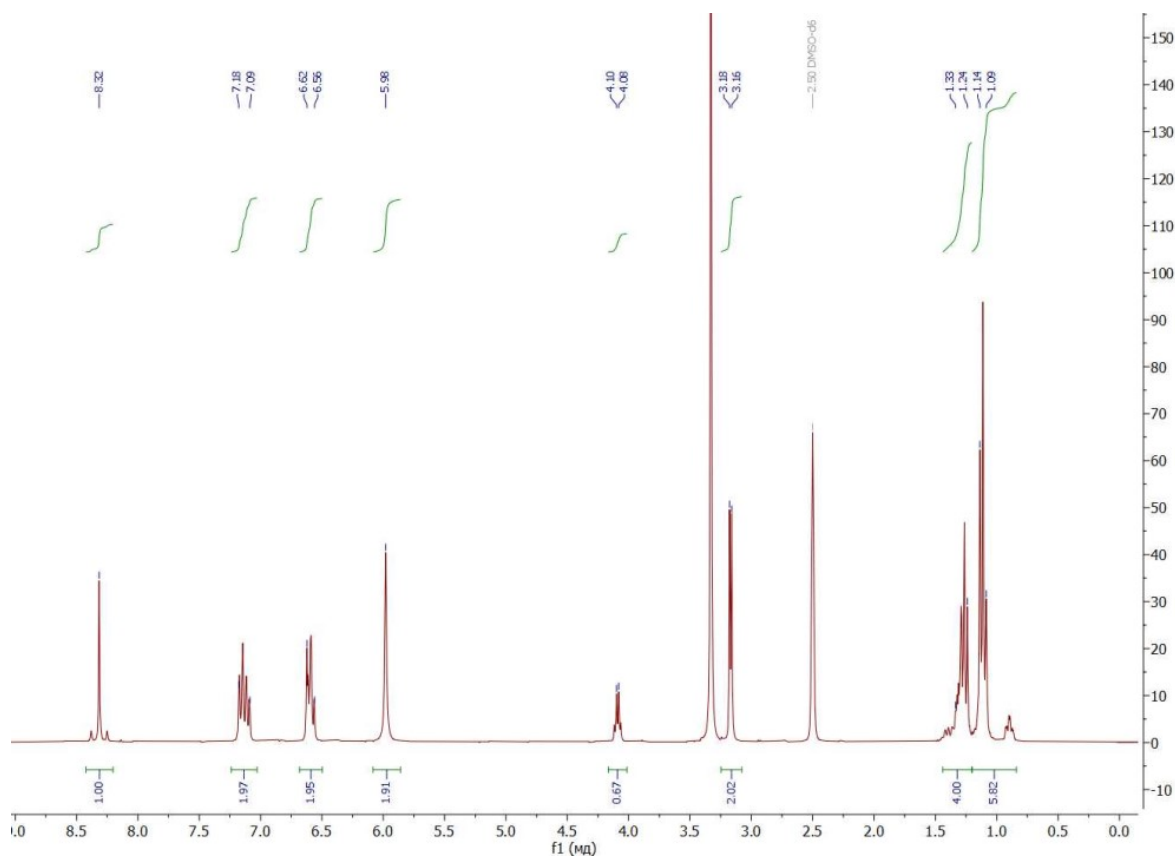

**Fig. S15.**  $^1\text{H}$  NMR spectrum for **1**.

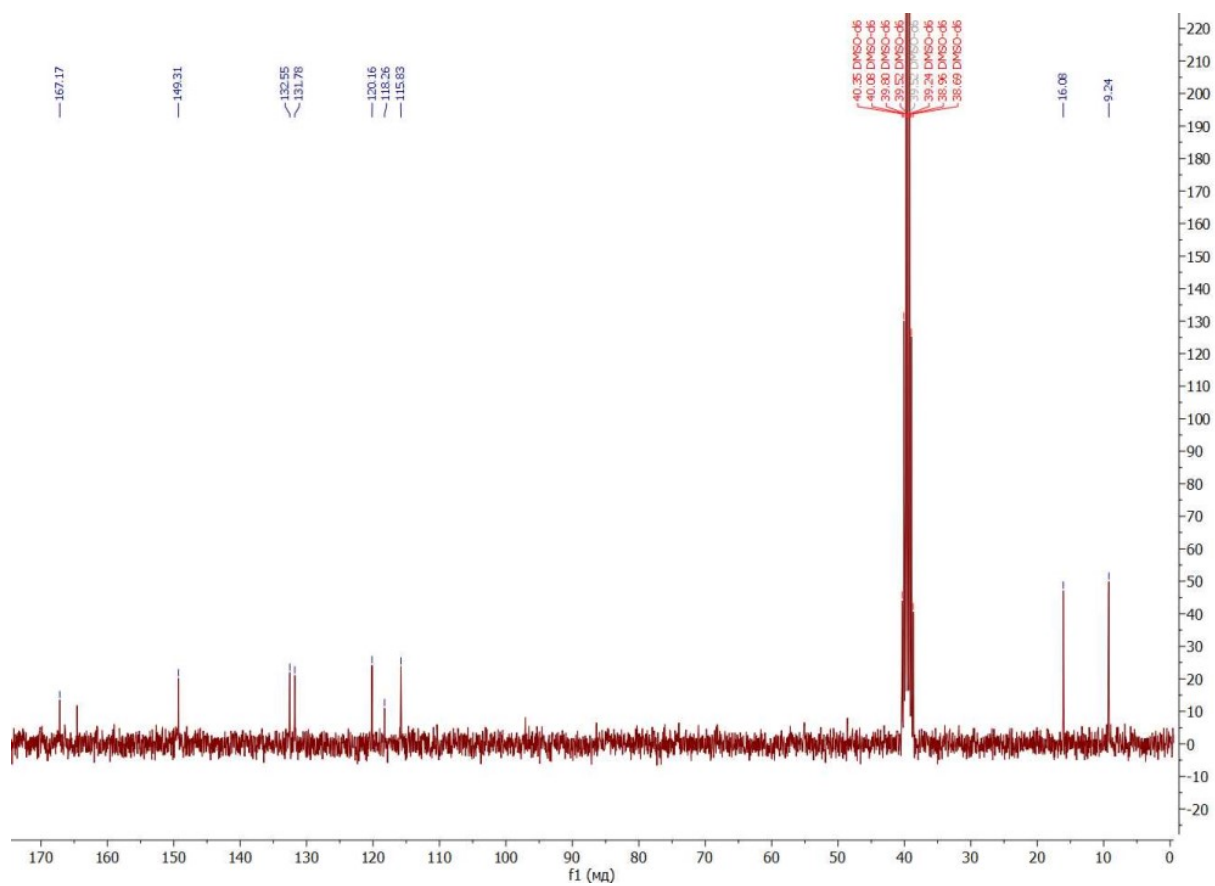

Fig. S16.  $^{13}\text{C}$  NMR spectrum for **1**.

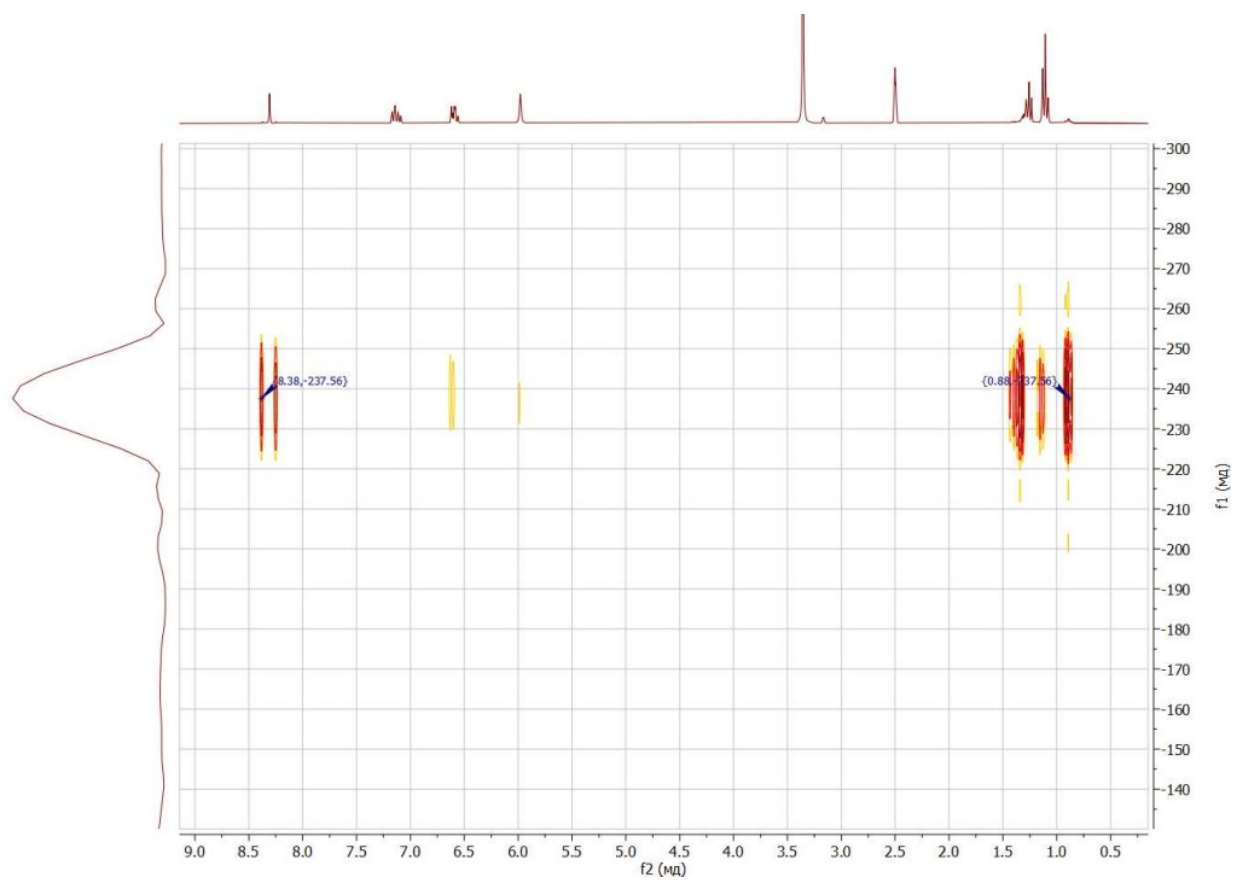

Fig. S17.  $^{119}\text{Sn}$  NMR spectrum for **1**.

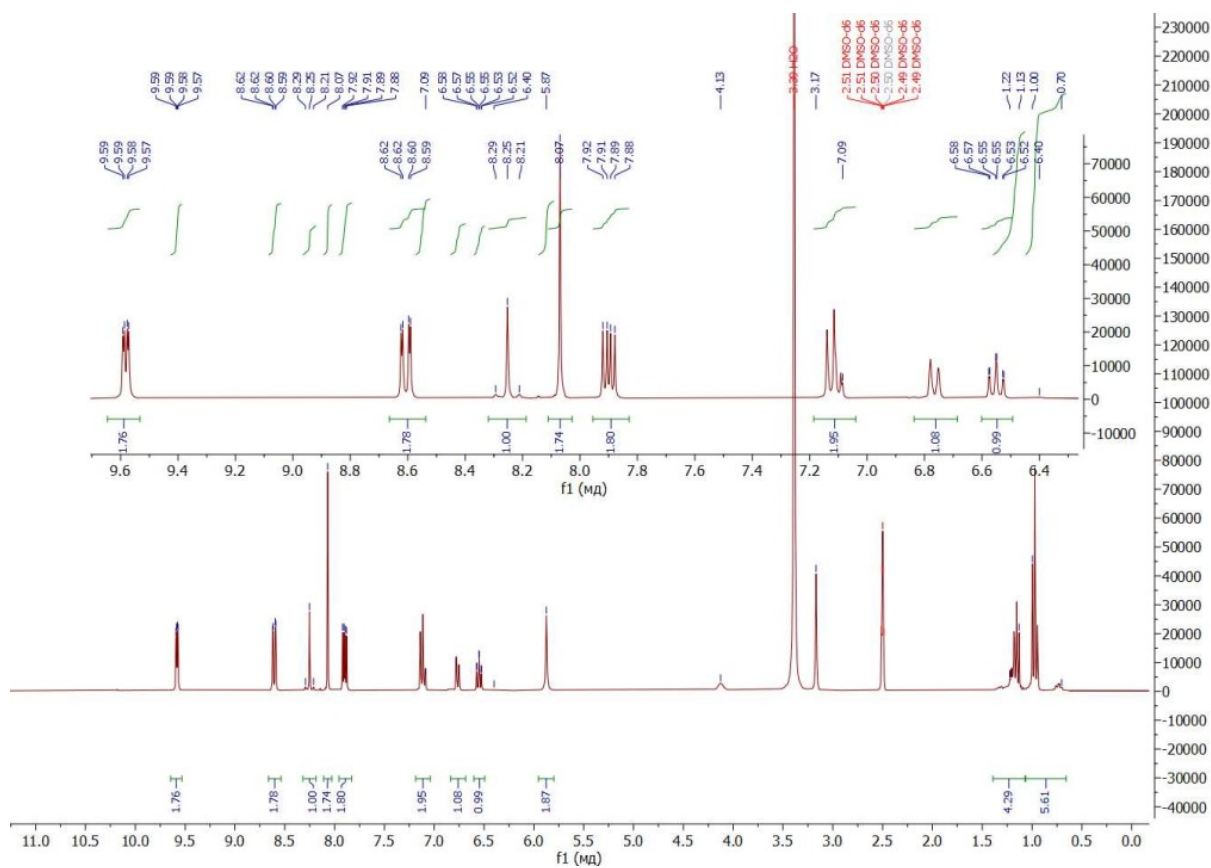

Fig. S18.  $^1\text{H}$  NMR spectrum for **2**.

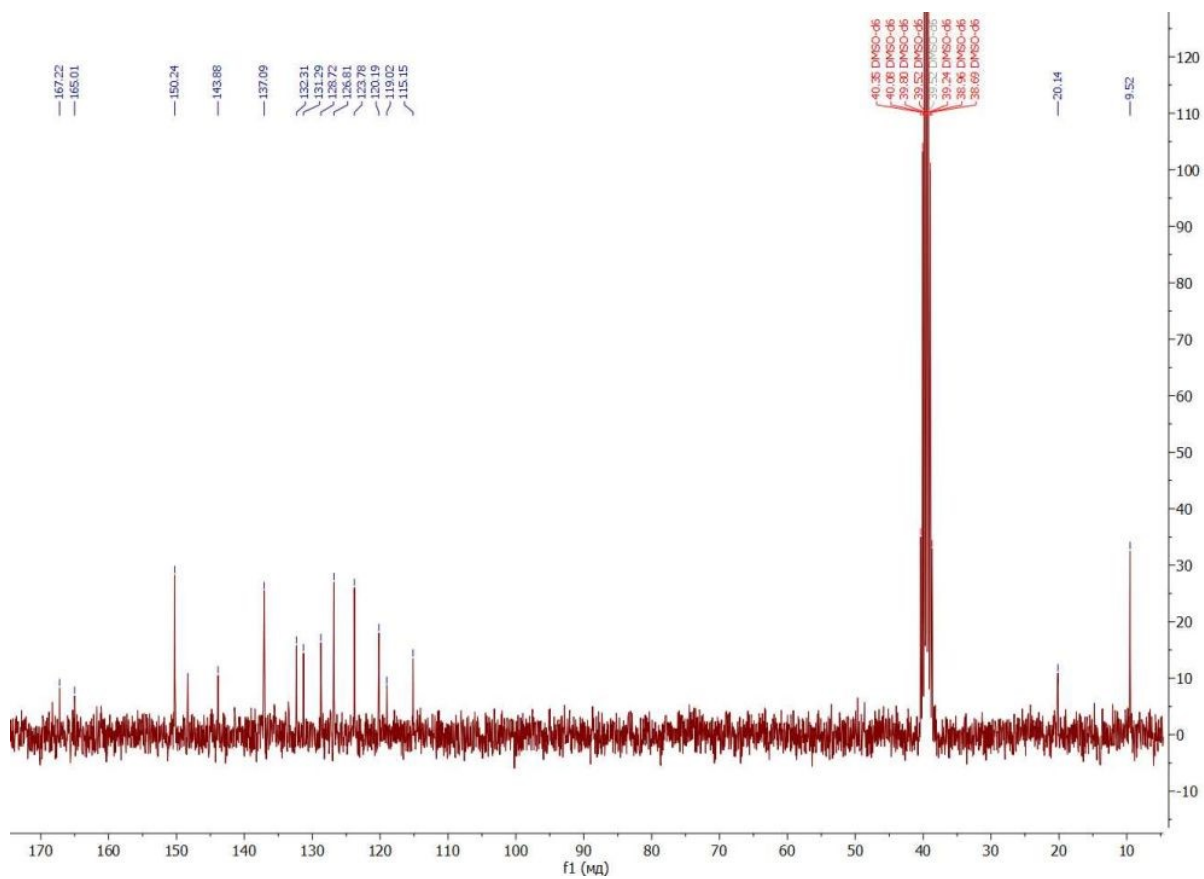

Fig. S19.  $^{13}\text{C}$  NMR spectrum for **2**.

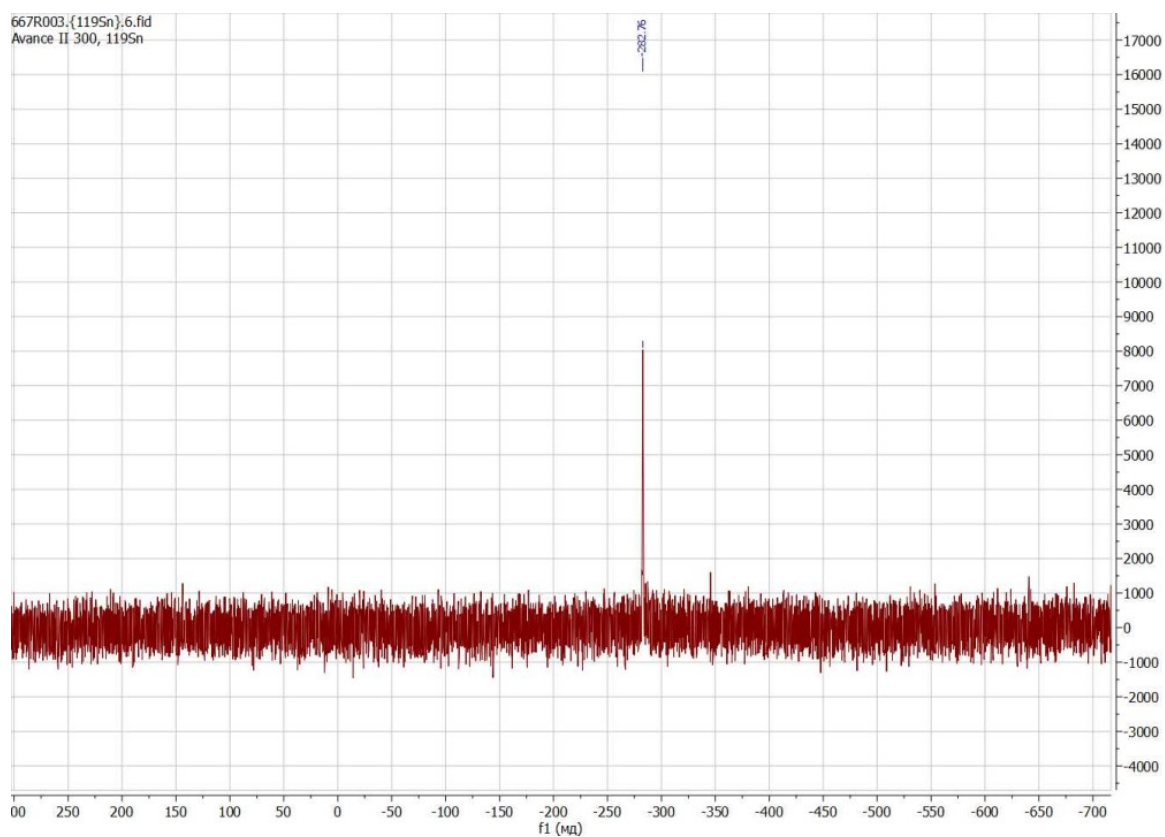

Fig. S20.  $^{119}\text{Sn}$  NMR spectrum for **2** (353 K).

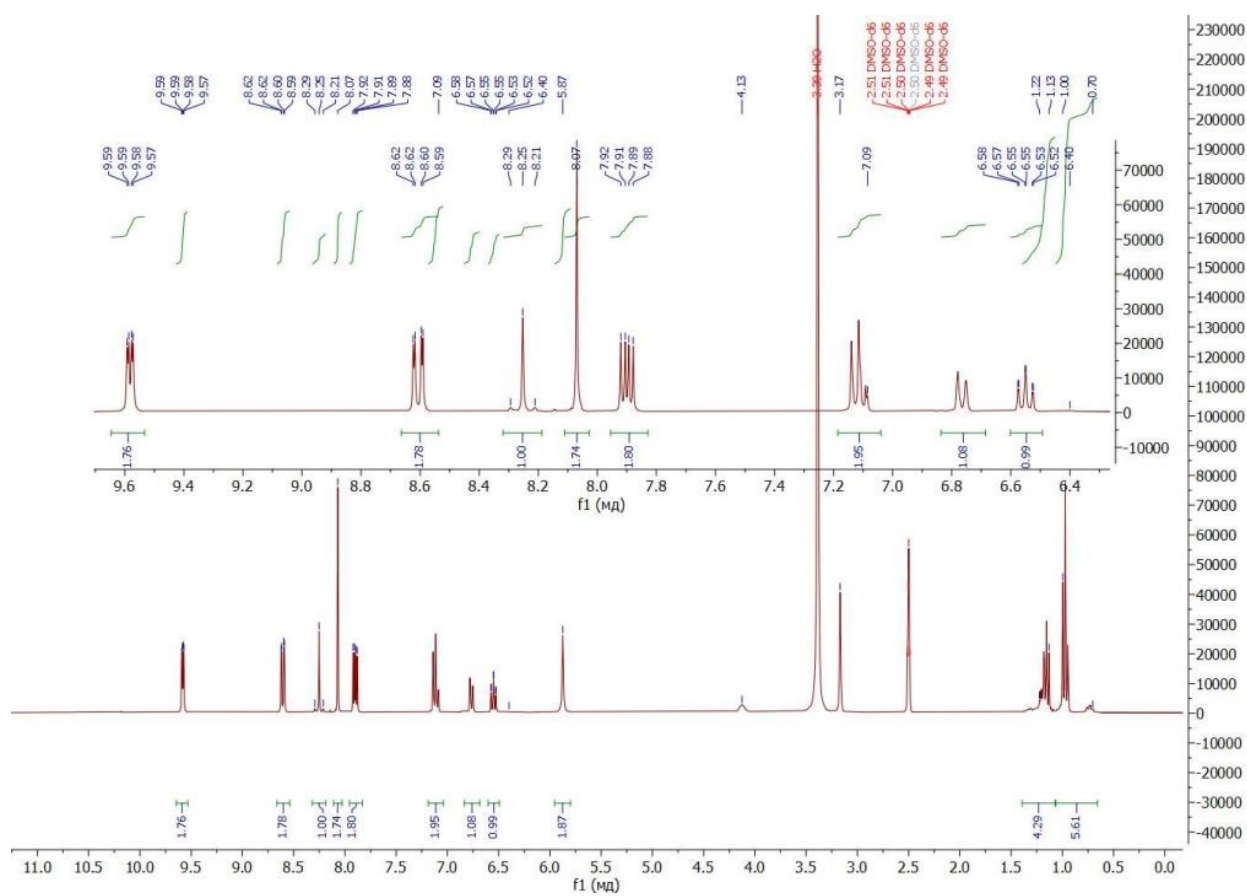

Fig. S21.  $^1\text{H}$  NMR spectrum for **3**.

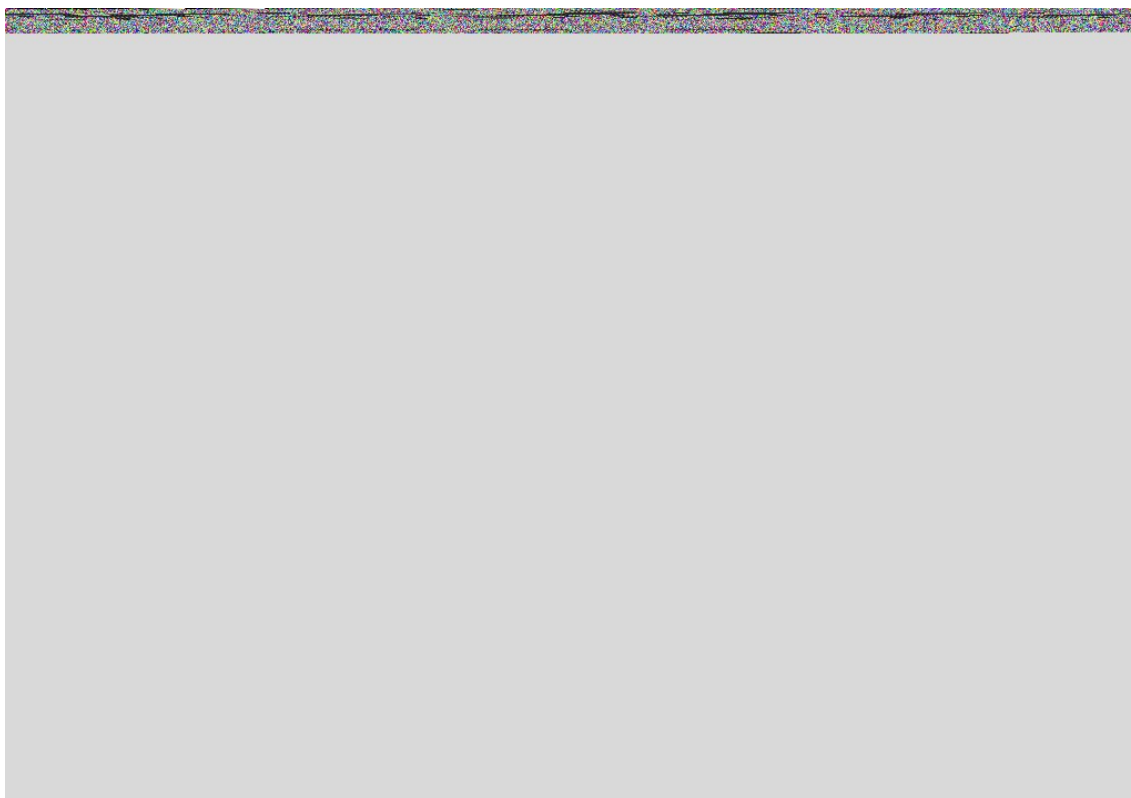

**Fig. S22.**  $^{13}\text{C}$  NMR spectrum for **3**.

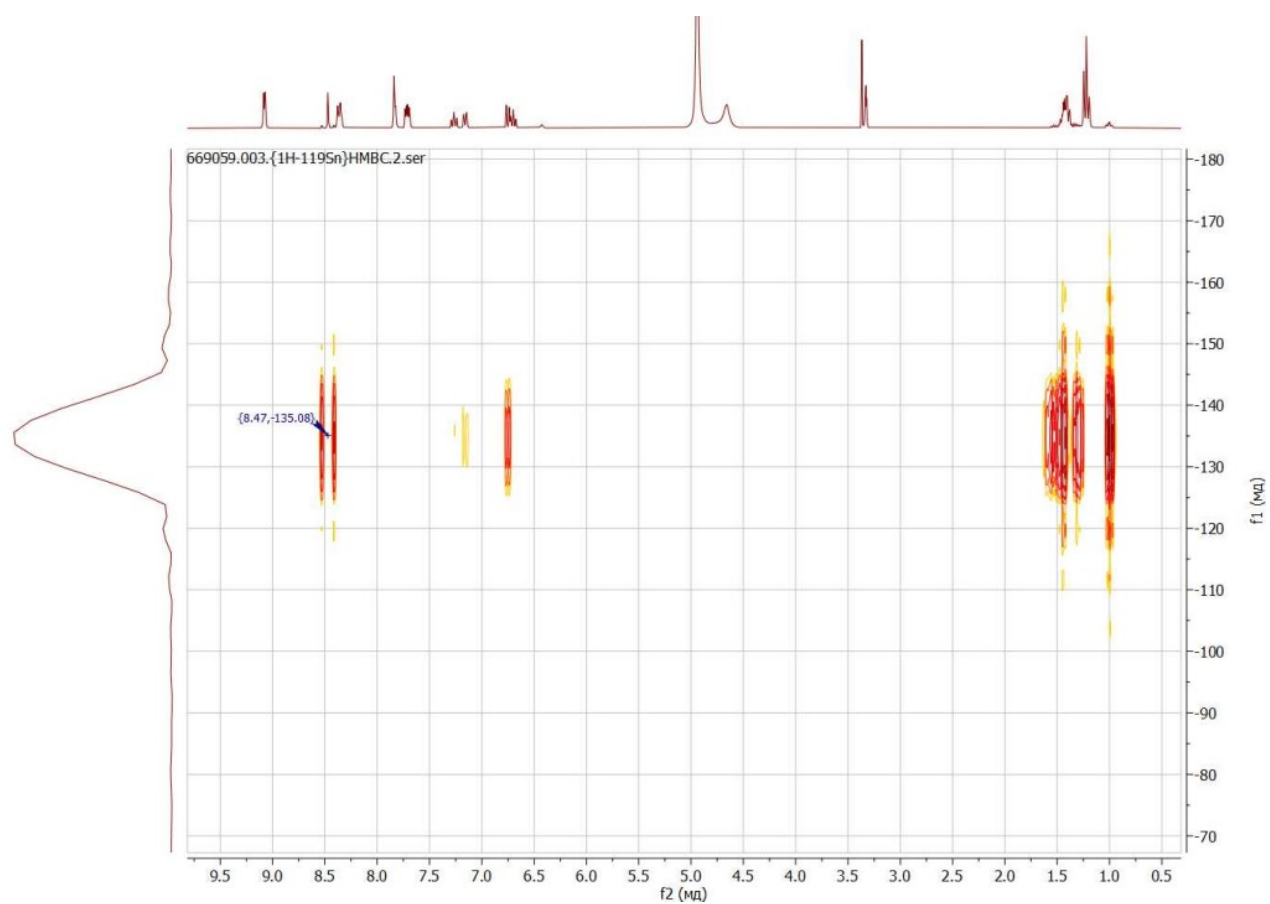

**Fig. S23.**  $^{119}\text{Sn}$  NMR spectrum for **3**.



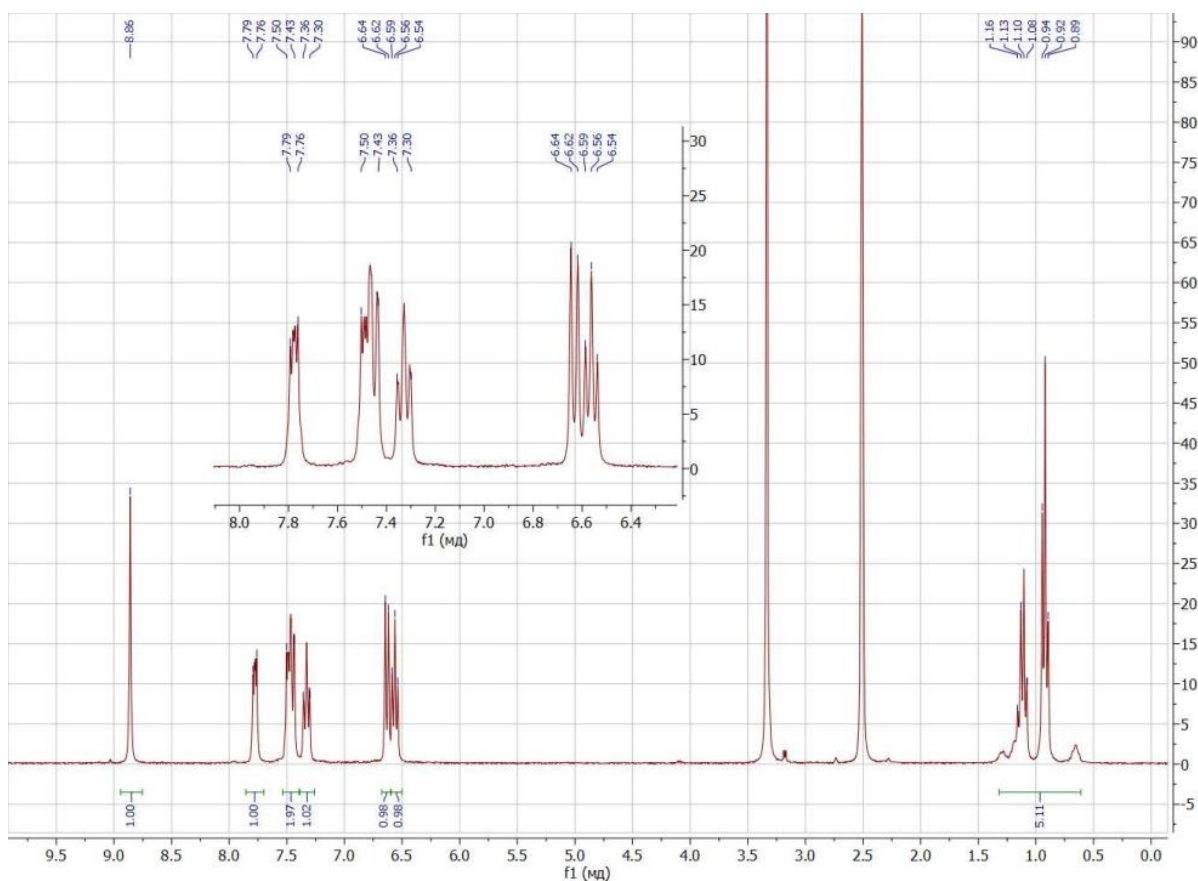

Fig. S24.  $^1\text{H}$  NMR spectrum for 4.

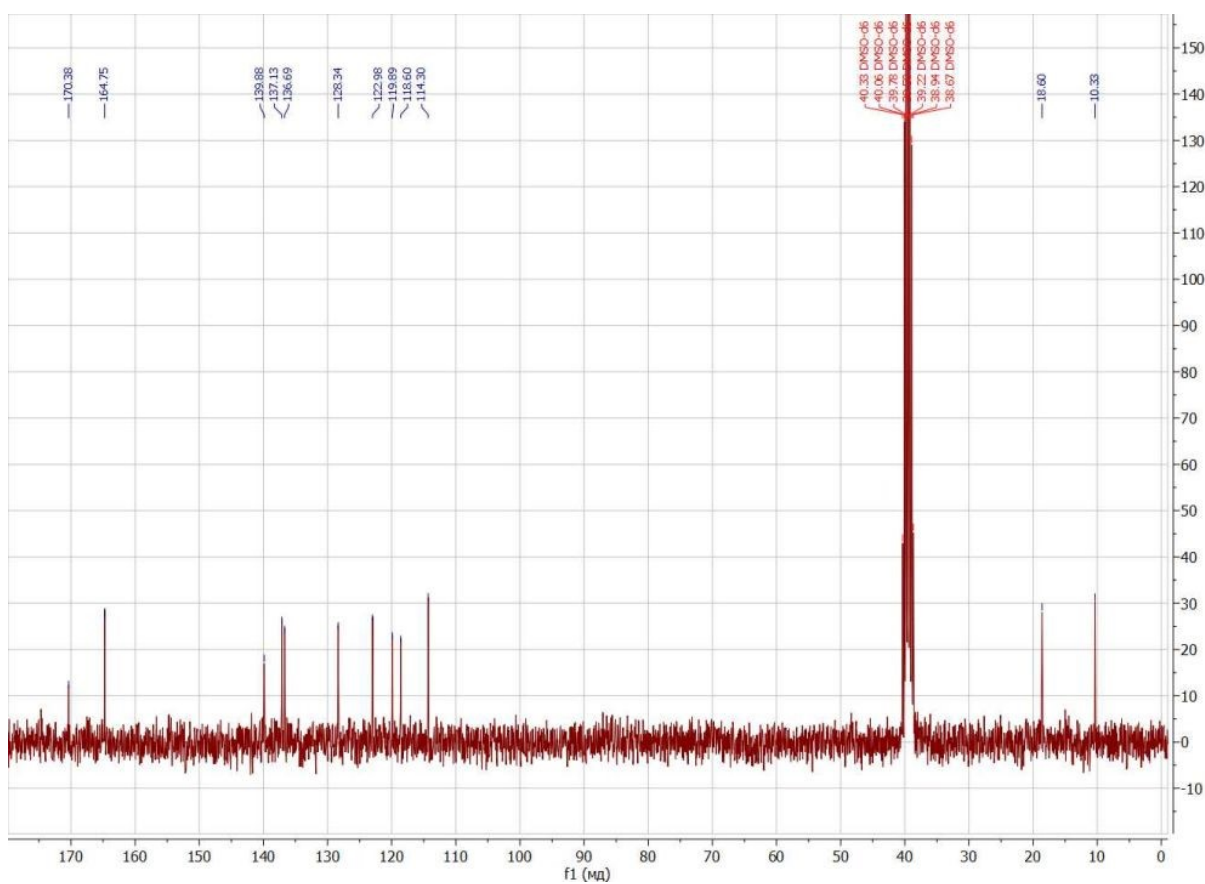

Fig. S25.  $^{13}\text{C}$  NMR spectrum for 4.



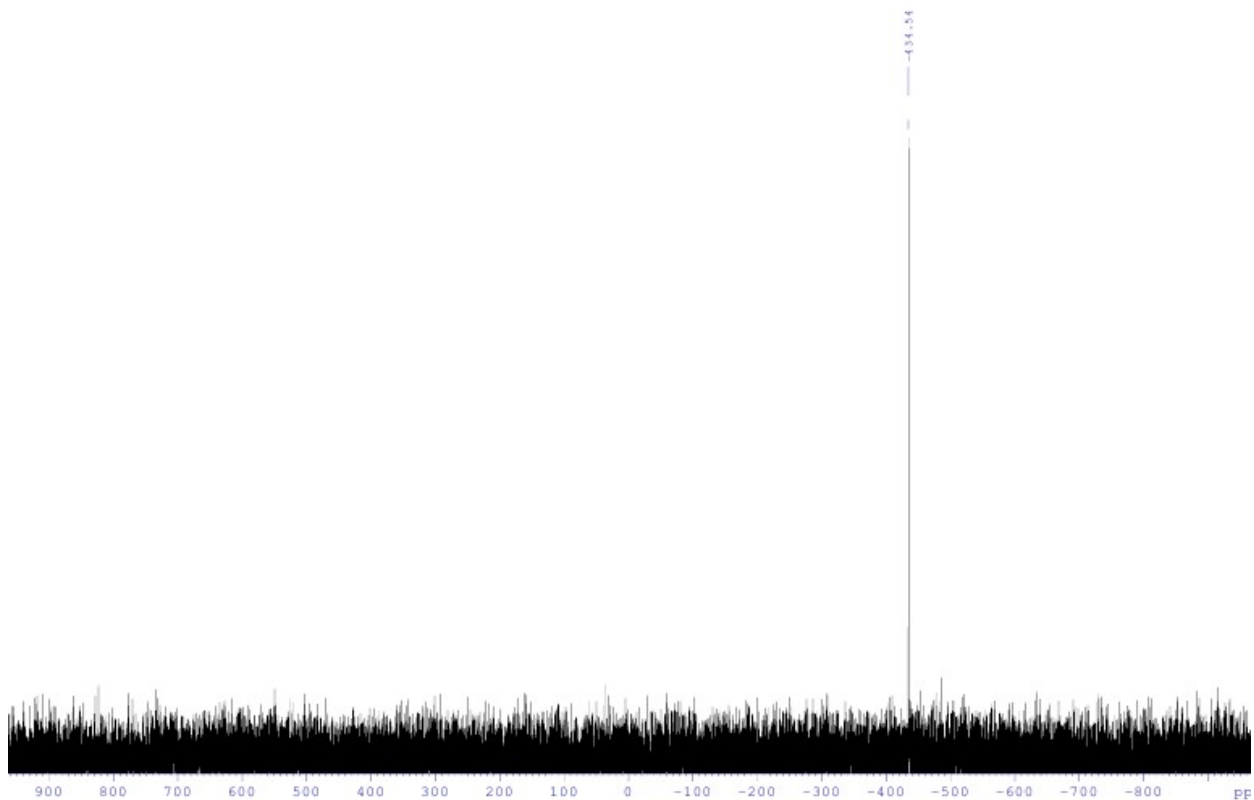

Fig. S26.  $^{119}\text{Sn}$  NMR spectrum for 4.

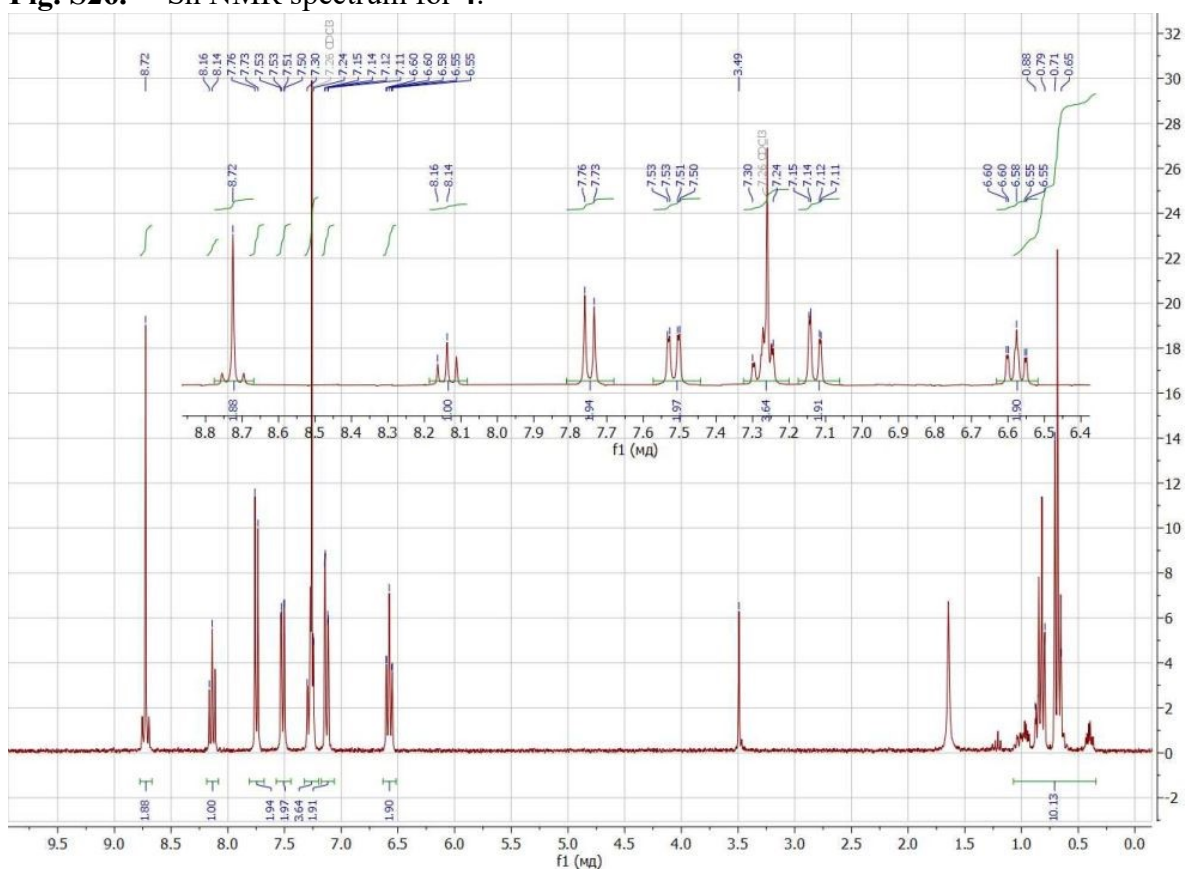

Fig. S27.  $^1\text{H}$  NMR spectrum for 5.

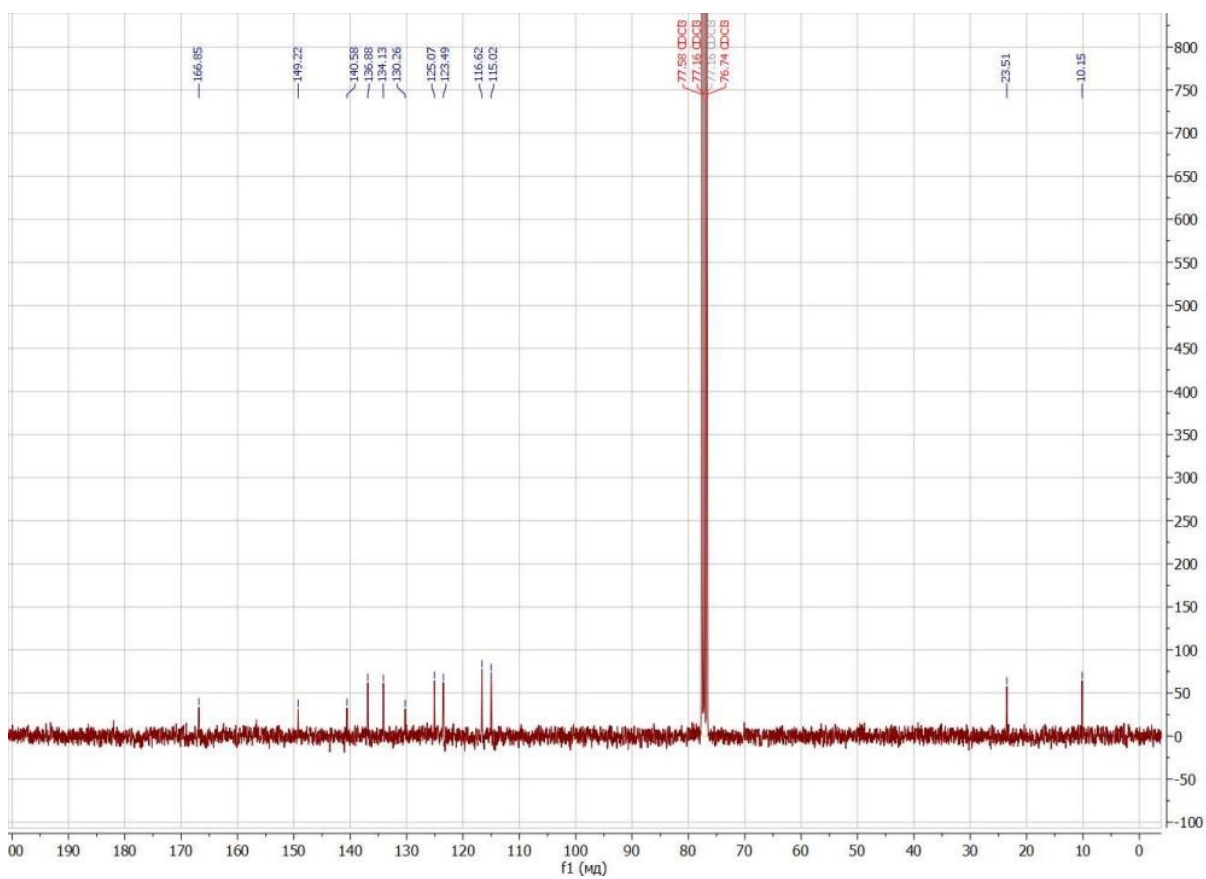

**Fig. S28.**  $^{13}\text{C}$  NMR spectrum for **5**.

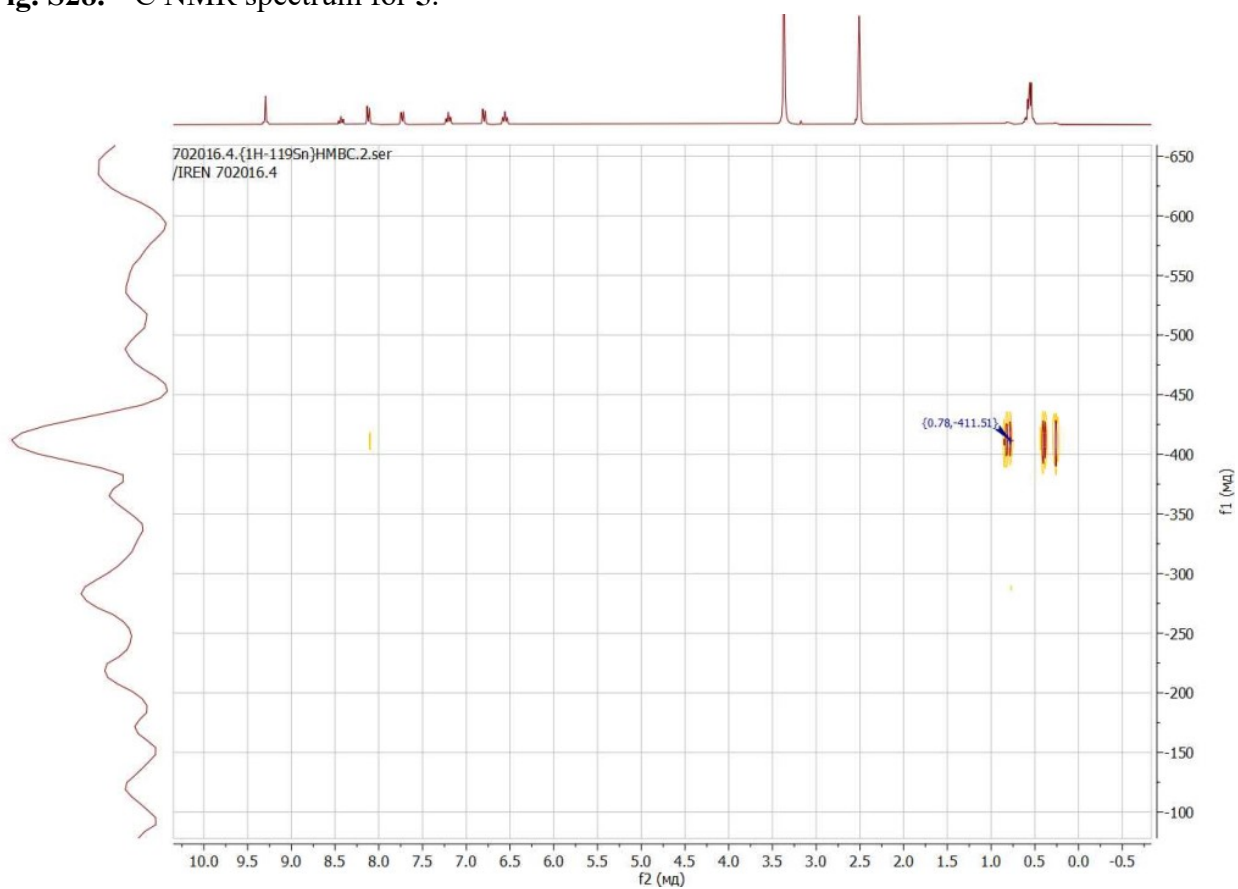

**Fig. S29.**  $^{119}\text{Sn}$  NMR spectrum for **5**.

8. HOMO and LUMO of 1-5 calculated by the DFT PBE0/def2-TZVPP

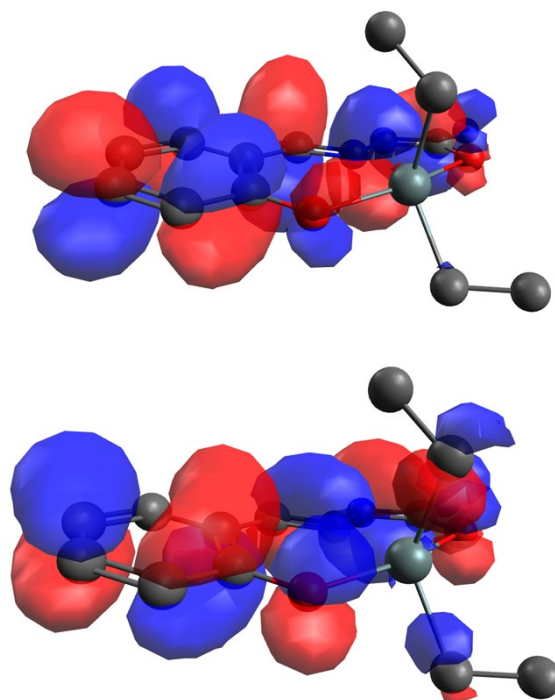

Fig. S30. LUMO (*top*) and HOMO (*bottom*) of 1.

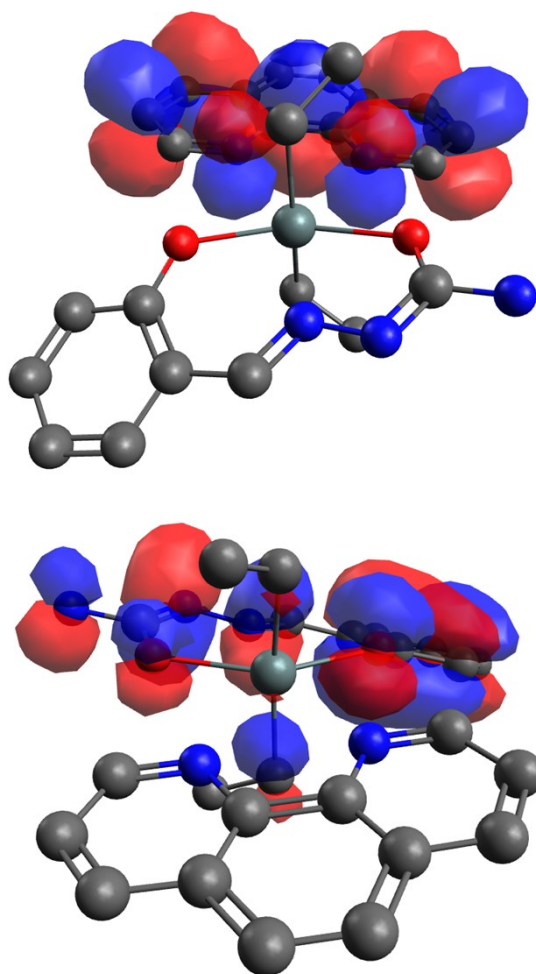

Fig. S31. LUMO (*top*) and HOMO (*bottom*) of 2.

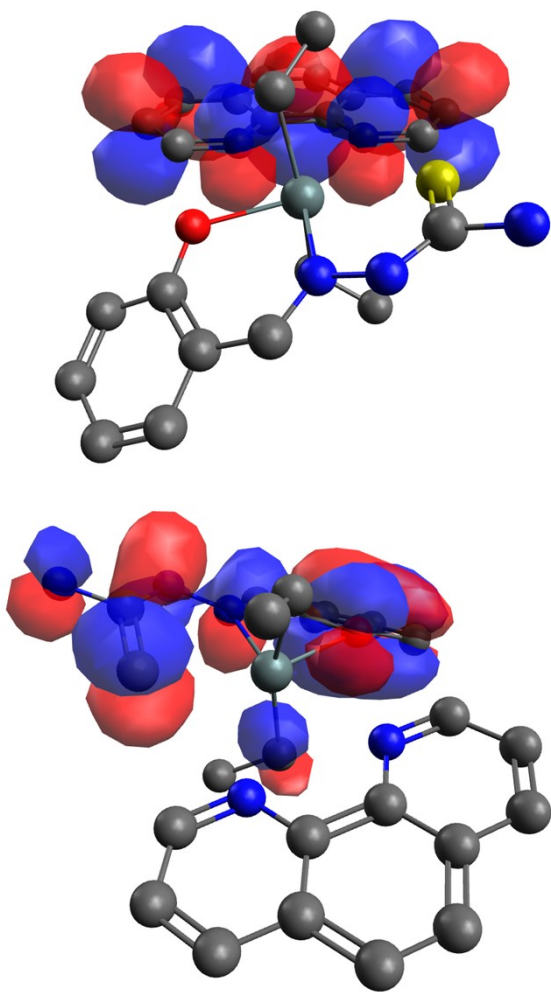

**Fig. S32.** LUMO (*top*) and HOMO (*bottom*) of **3**.

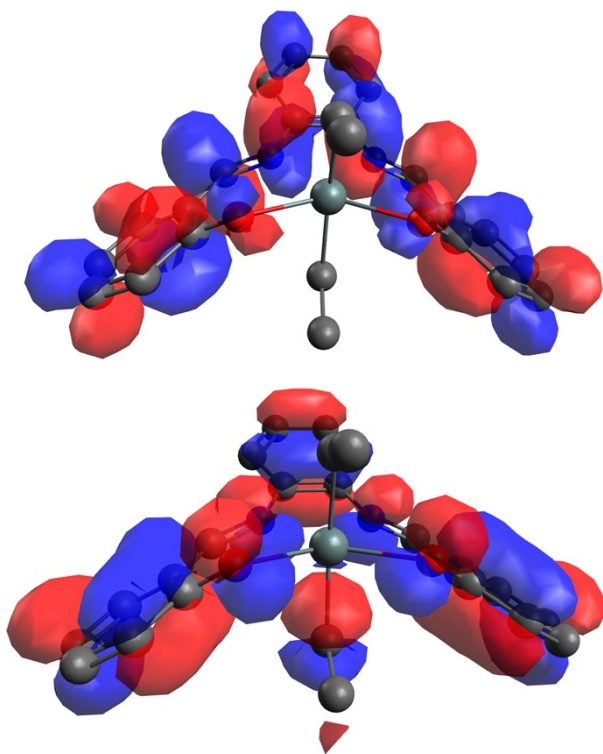

**Fig. S33.** LUMO (*top*) and HOMO (*bottom*) of **4**.

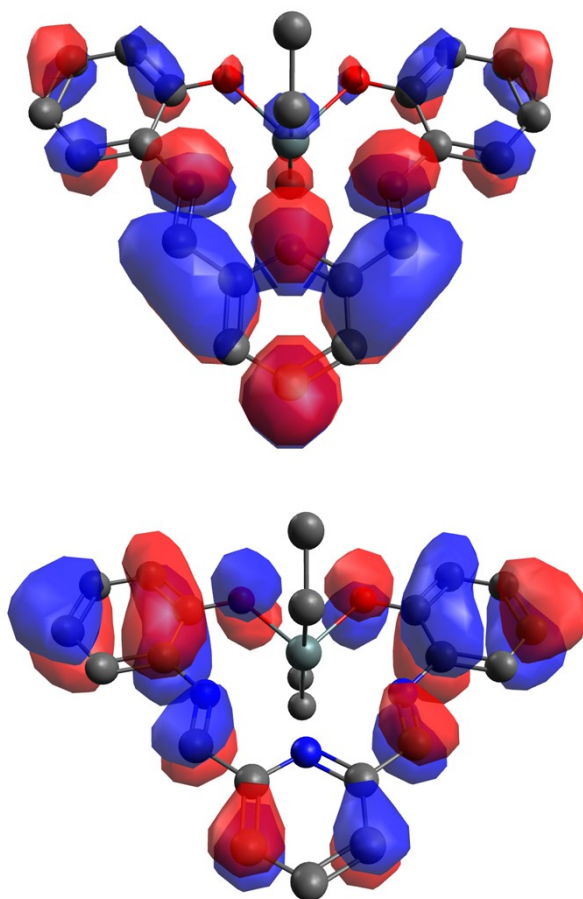

**Fig. S34.** LUMO (*top*) and HOMO (*bottom*) of **5**.

**9. Cartesian coordinates and total energy values  
of 1-5 calculated by the DFT PBE0/def2-TZVPP**

**1:** E = -997.279765901753 Eh

|    |          |          |          |
|----|----------|----------|----------|
| C  | -2.15658 | 1.86933  | -0.36287 |
| C  | 1.22093  | 1.53345  | -0.23167 |
| C  | 2.19766  | -0.67727 | 0.48416  |
| C  | 2.33454  | 0.63987  | -0.01415 |
| C  | 3.61725  | 1.14083  | -0.30423 |
| H  | 3.69989  | 2.15591  | -0.67973 |
| C  | 4.74986  | 0.38094  | -0.12282 |
| C  | 4.61129  | -0.92002 | 0.37618  |
| C  | 3.36953  | -1.43666 | 0.67456  |
| H  | 1.45224  | 2.55346  | -0.53429 |
| H  | 5.72787  | 0.78243  | -0.35575 |
| H  | 5.49270  | -1.53253 | 0.53312  |
| H  | 3.25625  | -2.44143 | 1.06314  |
| Sn | -0.90376 | -0.67231 | 0.31101  |
| N  | -0.03173 | 1.26294  | -0.11781 |
| O  | 1.04024  | -1.21141 | 0.79700  |
| O  | -2.53792 | 0.66191  | -0.12376 |
| N  | -0.91144 | 2.29490  | -0.38049 |
| N  | -3.13090 | 2.78259  | -0.65320 |
| H  | -2.86431 | 3.75033  | -0.60944 |
| H  | -4.06198 | 2.54240  | -0.36467 |
| C  | -1.05793 | -1.78366 | -1.48495 |
| C  | -0.22977 | -1.12352 | -2.59101 |
| H  | -2.11171 | -1.84129 | -1.76093 |
| H  | -0.70349 | -2.79568 | -1.28232 |
| H  | -0.29658 | -1.68679 | -3.52510 |
| H  | -0.57381 | -0.10645 | -2.79360 |
| H  | 0.82610  | -1.06535 | -2.31579 |
| C  | -1.64501 | -1.14121 | 2.23699  |
| C  | -3.12277 | -1.53173 | 2.23735  |
| H  | -1.46925 | -0.26232 | 2.86102  |
| H  | -1.00921 | -1.93919 | 2.62317  |
| H  | -3.47370 | -1.74644 | 3.25016  |
| H  | -3.74080 | -0.73157 | 1.82784  |
| H  | -3.30058 | -2.42579 | 1.63390  |

**2:** E = -1569.367698506334 Eh

|   |         |          |          |
|---|---------|----------|----------|
| C | 0.74905 | 3.09876  | 0.30590  |
| C | 3.04191 | 0.66136  | -0.16876 |
| C | 2.32715 | -1.75602 | 0.03425  |
| C | 3.26603 | -0.76248 | -0.34026 |
| C | 4.50592 | -1.14693 | -0.87463 |

|    |          |          |          |
|----|----------|----------|----------|
| H  | 5.21241  | -0.36695 | -1.14213 |
| C  | 4.84125  | -2.47041 | -1.06653 |
| C  | 3.91630  | -3.45170 | -0.69897 |
| C  | 2.69504  | -3.10471 | -0.16129 |
| H  | 3.89561  | 1.32117  | -0.32310 |
| H  | 5.80178  | -2.74219 | -1.48592 |
| H  | 4.16010  | -4.50031 | -0.83359 |
| H  | 1.98321  | -3.86717 | 0.13369  |
| Sn | -0.07071 | 0.23769  | 0.30600  |
| N  | 1.93280  | 1.22983  | 0.12803  |
| O  | 1.16756  | -1.48170 | 0.57769  |
| O  | -0.34913 | 2.43283  | 0.28569  |
| N  | 1.96513  | 2.60704  | 0.23505  |
| N  | 0.64233  | 4.47147  | 0.36971  |
| H  | 1.48689  | 4.94860  | 0.63640  |
| H  | -0.20385 | 4.80758  | 0.79516  |
| N  | -1.87368 | -1.80759 | 0.42232  |
| N  | -2.78934 | 0.73493  | -0.07217 |
| C  | -3.19057 | -1.62798 | 0.18926  |
| C  | -3.67471 | -0.28326 | -0.07685 |
| C  | -3.22448 | 1.95435  | -0.30991 |
| C  | -4.57372 | 2.25081  | -0.56695 |
| C  | -5.48382 | 1.22701  | -0.56767 |
| C  | -1.42923 | -3.02153 | 0.67290  |
| C  | -2.26551 | -4.14968 | 0.70696  |
| C  | -3.60418 | -3.98318 | 0.46632  |
| C  | -5.04522 | -0.08738 | -0.31839 |
| C  | -4.10521 | -2.69482 | 0.19888  |
| C  | -5.49929 | -2.45253 | -0.05586 |
| C  | -5.94878 | -1.20538 | -0.30267 |
| H  | -0.36167 | -3.09511 | 0.84823  |
| H  | -1.84429 | -5.12435 | 0.91800  |
| H  | -4.28557 | -4.82707 | 0.47968  |
| H  | -6.18008 | -3.29629 | -0.04358 |
| H  | -7.00011 | -1.02106 | -0.49312 |
| H  | -6.53607 | 1.41149  | -0.75563 |
| H  | -4.87323 | 3.27400  | -0.75503 |
| H  | -2.46882 | 2.73095  | -0.28812 |
| C  | -0.41663 | 0.24672  | 2.39400  |
| C  | -1.71931 | 0.85795  | 2.89082  |
| H  | 0.44285  | 0.79479  | 2.78967  |
| H  | -0.30815 | -0.79047 | 2.71150  |
| H  | -1.73891 | 0.89799  | 3.98414  |
| H  | -1.84794 | 1.87389  | 2.51394  |
| H  | -2.58294 | 0.27415  | 2.56878  |
| C  | -0.28150 | -0.06075 | -1.78297 |
| C  | -0.15335 | 1.22125  | -2.59862 |
| H  | -1.23581 | -0.55444 | -1.96187 |

|   |          |          |          |
|---|----------|----------|----------|
| H | 0.50938  | -0.76880 | -2.04156 |
| H | -0.18024 | 1.00819  | -3.67130 |
| H | -0.96162 | 1.91819  | -2.37201 |
| H | 0.78598  | 1.73768  | -2.38895 |

**3:** E = -1892.305906781324 Eh

|    |          |          |          |
|----|----------|----------|----------|
| C  | 1.19725  | 3.39654  | 0.58980  |
| C  | 3.07937  | 0.68609  | -0.12943 |
| C  | 2.26653  | -1.68907 | 0.01220  |
| C  | 3.20779  | -0.72388 | -0.42313 |
| C  | 4.37229  | -1.13431 | -1.09477 |
| H  | 5.08652  | -0.37477 | -1.39789 |
| C  | 4.61997  | -2.45998 | -1.37148 |
| C  | 3.69108  | -3.41640 | -0.94333 |
| C  | 2.55040  | -3.04529 | -0.26653 |
| H  | 3.97402  | 1.29633  | -0.24981 |
| H  | 5.51855  | -2.75748 | -1.89689 |
| H  | 3.87281  | -4.46757 | -1.14131 |
| H  | 1.84026  | -3.79001 | 0.07345  |
| Sn | -0.03802 | 0.37278  | 0.35261  |
| N  | 2.02786  | 1.30961  | 0.26918  |
| O  | 1.19178  | -1.36935 | 0.67889  |
| S  | -0.45090 | 2.92855  | 0.32259  |
| N  | 2.25100  | 2.64693  | 0.55230  |
| N  | 1.40529  | 4.73039  | 0.83102  |
| H  | 2.30932  | 4.96834  | 1.20464  |
| H  | 0.61838  | 5.25122  | 1.17376  |
| N  | -1.89248 | -1.74564 | 0.46996  |
| N  | -2.91983 | 0.71525  | -0.23909 |
| C  | -3.21481 | -1.63953 | 0.22430  |
| C  | -3.75591 | -0.34349 | -0.15762 |
| C  | -3.41960 | 1.87668  | -0.60641 |
| C  | -4.77670 | 2.08224  | -0.90440 |
| C  | -5.63532 | 1.02098  | -0.80526 |
| C  | -1.40280 | -2.91583 | 0.82331  |
| C  | -2.19099 | -4.07072 | 0.95628  |
| C  | -3.53412 | -3.97959 | 0.70393  |
| C  | -5.13297 | -0.23728 | -0.42499 |
| C  | -4.08431 | -2.74049 | 0.32560  |
| C  | -5.48603 | -2.58550 | 0.04941  |
| C  | -5.98724 | -1.38736 | -0.31017 |
| H  | -0.33436 | -2.93231 | 1.00750  |
| H  | -1.73118 | -5.00504 | 1.25242  |
| H  | -4.18239 | -4.84490 | 0.79146  |
| H  | -6.12843 | -3.45470 | 0.13518  |
| H  | -7.04398 | -1.26625 | -0.52047 |
| H  | -6.69348 | 1.13123  | -1.01664 |



|   |          |          |          |
|---|----------|----------|----------|
| H | -5.11917 | 3.06582  | -1.19946 |
| H | -2.72383 | 2.70511  | -0.67095 |
| C | -0.49208 | 0.27573  | 2.42336  |
| C | -1.87125 | 0.75157  | 2.85405  |
| H | 0.28822  | 0.88964  | 2.88106  |
| H | -0.30825 | -0.75845 | 2.71273  |
| H | -1.95890 | 0.74708  | 3.94470  |
| H | -2.06494 | 1.76816  | 2.50739  |
| H | -2.65745 | 0.10722  | 2.45890  |
| C | -0.19654 | -0.06232 | -1.72374 |
| C | -0.12044 | 1.15379  | -2.63642 |
| H | -1.12647 | -0.61120 | -1.86102 |
| H | 0.62570  | -0.75209 | -1.92376 |
| H | -0.10511 | 0.84949  | -3.68735 |
| H | -0.97219 | 1.81886  | -2.48876 |
| H | 0.77911  | 1.74355  | -2.44638 |

**4:** E = -1404.368331641860 Eh

|   |          |          |          |
|---|----------|----------|----------|
| C | -0.73410 | 4.91914  | 0.30548  |
| C | -1.41566 | 3.71394  | 0.20675  |
| C | -0.71392 | 2.52302  | 0.04777  |
| C | 0.68949  | 2.54102  | 0.02394  |
| C | 1.36425  | 3.75040  | 0.15923  |
| C | 0.65466  | 4.93721  | 0.28162  |
| H | -1.28857 | 5.84088  | 0.43343  |
| H | -2.49587 | 3.69421  | 0.28491  |
| H | 2.44661  | 3.76018  | 0.20037  |
| H | 1.18884  | 5.87325  | 0.39068  |
| C | -2.49624 | 1.10746  | -0.55267 |
| C | 2.48844  | 1.17316  | -0.63501 |
| N | -1.32530 | 1.25453  | -0.02208 |
| N | 1.33077  | 1.28818  | -0.06834 |
| H | 2.90023  | 2.05881  | -1.12558 |
| H | -2.94544 | 1.97960  | -1.03471 |
| C | 3.30574  | 0.00461  | -0.71101 |
| C | 3.04697  | -1.19369 | 0.02746  |
| C | 4.46508  | 0.09334  | -1.52143 |
| C | 3.98713  | -2.25324 | -0.11854 |
| C | 5.34386  | -0.94683 | -1.64515 |
| H | 4.64582  | 1.02131  | -2.05608 |
| C | 5.08616  | -2.13233 | -0.92573 |
| H | 3.79514  | -3.16049 | 0.44144  |
| H | 6.22071  | -0.86315 | -2.27409 |
| H | 5.77609  | -2.96558 | -1.00979 |
| C | -3.28402 | -0.08311 | -0.59690 |
| C | -2.97372 | -1.26414 | 0.14931  |
| C | -4.46542 | -0.03591 | -1.37818 |

|    |          |          |          |
|----|----------|----------|----------|
| C  | -3.88990 | -2.34903 | 0.04455  |
| C  | -5.31889 | -1.10082 | -1.46512 |
| H  | -4.68446 | 0.87940  | -1.92028 |
| C  | -5.01232 | -2.26838 | -0.73541 |
| H  | -3.65983 | -3.24276 | 0.61190  |
| H  | -6.21312 | -1.04936 | -2.07270 |
| H  | -5.68239 | -3.12012 | -0.78942 |
| O  | -1.94607 | -1.37203 | 0.91493  |
| O  | 2.04554  | -1.33914 | 0.82070  |
| Sn | 0.03565  | -0.47265 | 0.55798  |
| C  | -0.00166 | -1.40722 | -1.34908 |
| C  | -0.00935 | -2.93208 | -1.26316 |
| H  | 0.87203  | -1.05045 | -1.89814 |
| H  | -0.89102 | -1.04108 | -1.86585 |
| H  | -0.04581 | -3.38530 | -2.25779 |
| H  | 0.88771  | -3.30012 | -0.76103 |
| H  | -0.87614 | -3.28865 | -0.70322 |
| C  | 0.07716  | -0.10828 | 2.63842  |
| C  | 0.08399  | -1.39610 | 3.46118  |
| H  | -0.80119 | 0.49835  | 2.86583  |
| H  | 0.97049  | 0.48762  | 2.83292  |
| H  | 0.10289  | -1.17695 | 4.53276  |
| H  | -0.80705 | -1.99222 | 3.25635  |
| H  | 0.96161  | -2.00185 | 3.22763  |

**5:** E = -1420.403956755483 Eh

|    |          |          |          |
|----|----------|----------|----------|
| C  | 0.00001  | 1.15596  | -2.79567 |
| C  | 0.00002  | 1.19964  | -4.18850 |
| C  | 0.00001  | 0.00000  | -4.88651 |
| C  | 0.00001  | -1.19964 | -4.18849 |
| C  | 0.00001  | -1.15597 | -2.79567 |
| N  | 0.00001  | -0.00000 | -2.13837 |
| H  | 0.00002  | 0.00000  | -5.97009 |
| H  | 0.00001  | 2.15125  | -4.70541 |
| H  | 0.00001  | -2.15125 | -4.70541 |
| C  | -0.00000 | -2.37391 | -1.96090 |
| C  | 0.00001  | 2.37390  | -1.96089 |
| N  | 0.00000  | -2.23820 | -0.69787 |
| N  | 0.00001  | 2.23819  | -0.69786 |
| H  | -0.00001 | -3.33879 | -2.46953 |
| H  | 0.00001  | 3.33878  | -2.46952 |
| Sn | 0.00002  | -0.00001 | 0.39494  |
| C  | -0.00000 | 3.23827  | 0.26856  |
| C  | -0.00002 | 4.61425  | -0.00619 |
| C  | 0.00001  | 2.75937  | 1.60733  |
| C  | -0.00004 | 5.53441  | 1.01485  |
| H  | -0.00003 | 4.95655  | -1.03519 |

|   |          |          |          |
|---|----------|----------|----------|
| C | -0.00001 | 3.73262  | 2.63662  |
| C | -0.00003 | 5.07525  | 2.34343  |
| H | -0.00005 | 6.59558  | 0.79988  |
| H | -0.00001 | 3.37824  | 3.66014  |
| H | -0.00004 | 5.79491  | 3.15511  |
| C | -0.00001 | -3.23828 | 0.26855  |
| C | -0.00003 | -4.61426 | -0.00620 |
| C | 0.00001  | -2.75939 | 1.60733  |
| C | -0.00005 | -5.53443 | 1.01484  |
| H | -0.00004 | -4.95656 | -1.03520 |
| C | -0.00001 | -3.73263 | 2.63662  |
| C | -0.00004 | -5.07527 | 2.34341  |
| H | -0.00007 | -6.59559 | 0.79987  |
| H | -0.00001 | -3.37826 | 3.66013  |
| H | -0.00005 | -5.79493 | 3.15509  |
| O | 0.00003  | 1.49215  | 1.90527  |
| O | 0.00003  | -1.49217 | 1.90526  |
| C | -2.11387 | -0.00001 | 0.11731  |
| C | -2.88726 | 0.00003  | 1.43415  |
| H | -2.35664 | -0.88026 | -0.48129 |
| H | -2.35663 | 0.88021  | -0.48134 |
| H | -3.96719 | 0.00002  | 1.25765  |
| H | -2.64142 | -0.87818 | 2.03340  |
| H | -2.64143 | 0.87827  | 2.03335  |
| C | 2.11391  | -0.00001 | 0.11728  |
| C | 2.88732  | 0.00004  | 1.43411  |
| H | 2.35666  | 0.88020  | -0.48138 |
| H | 2.35666  | -0.88027 | -0.48131 |
| H | 3.96724  | 0.00003  | 1.25759  |
| H | 2.64150  | 0.87829  | 2.03330  |
| H | 2.64148  | -0.87816 | 2.03337  |
